# Supplementary material for: Breast Cancer Risk Factors in Iran: A Systematic Review and Meta-analysis
Source: Preprints.org preprint supplement (doi:10.20944/preprints202004.0074.v1), 2020-04-07
Supplement: Supplementary file 1 [file supplementary]

## Age

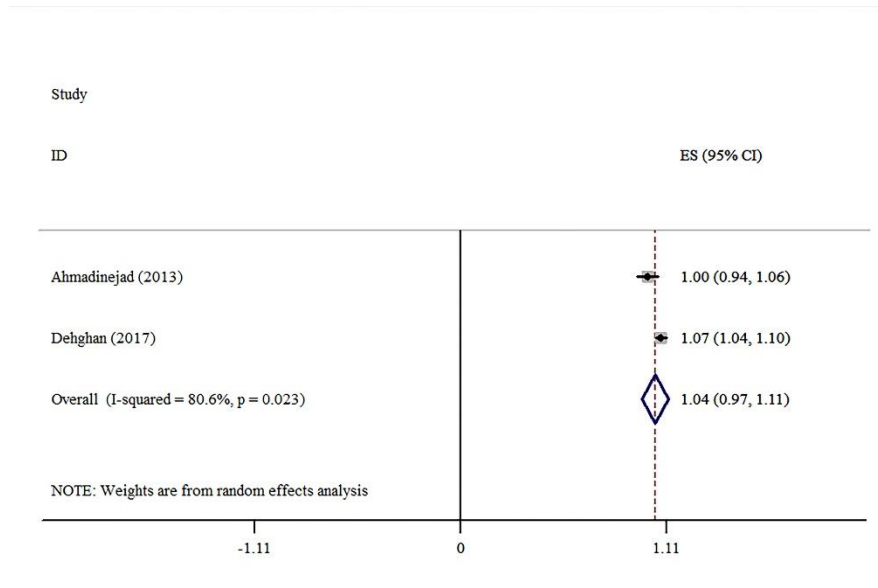

Supplement Figure 1. Forest plot for pooling adjusted odds ratio of age

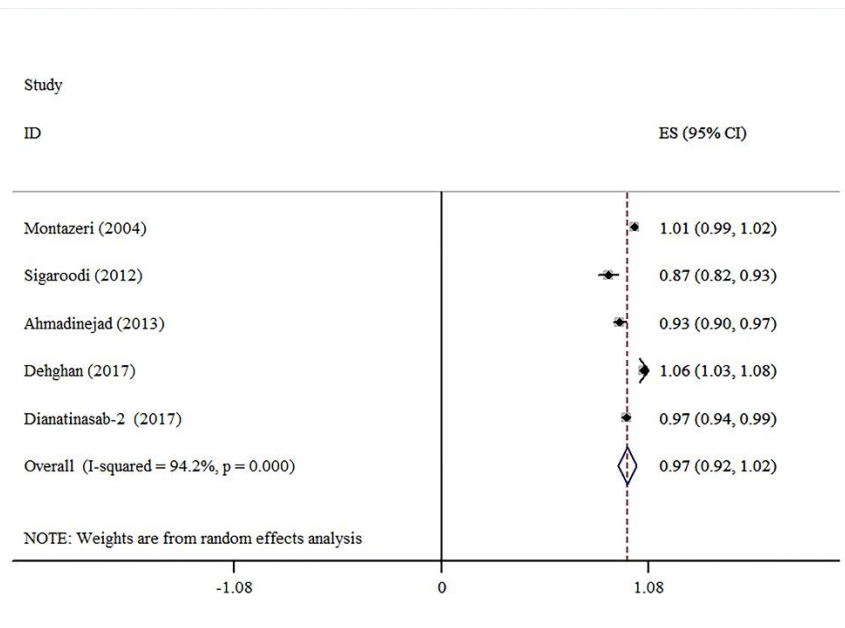

Supplement Figure 2. Forest plot for pooling odds ratio of age

## Family history

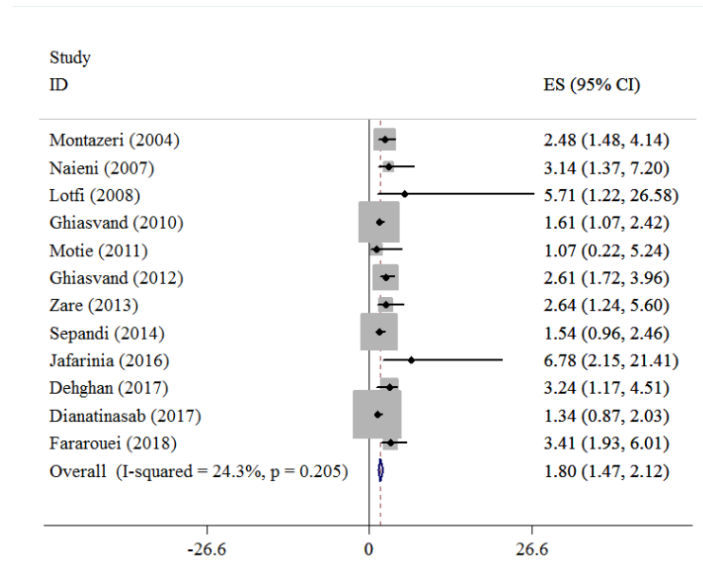

Supplement Figure 3. Forest plot for pooling adjusted odds ratio of family history

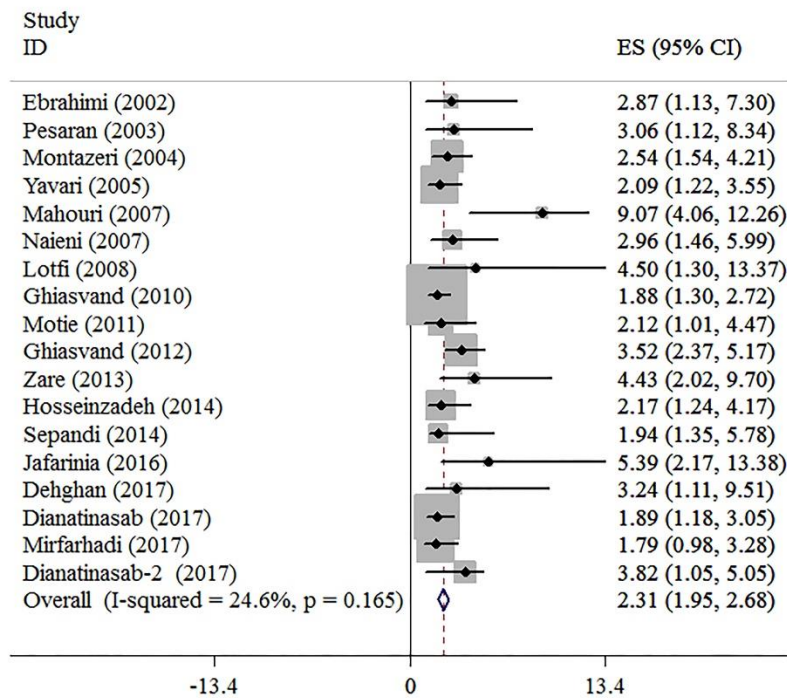

Supplement Figure 4. Forest plot for pooling odds ratio of family history

## Menarche age

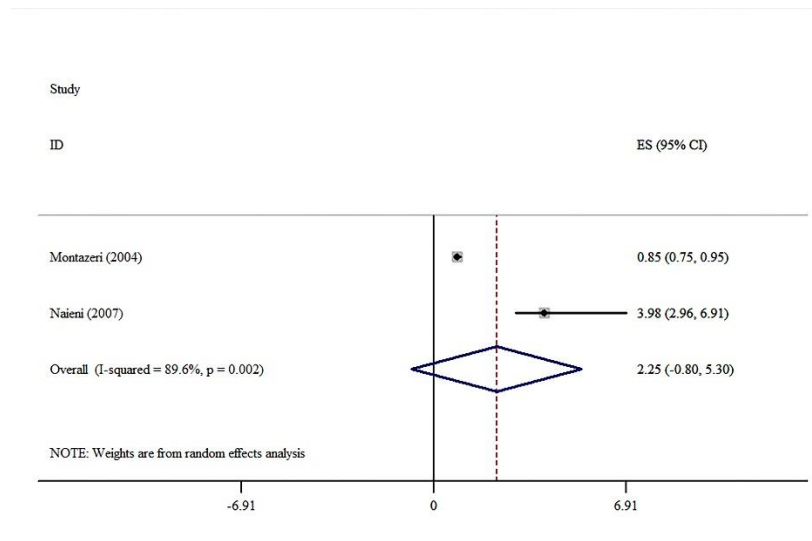

Supplement Figure 5. Forest plot for pooling adjusted odds ratio of menarche age

## Menarche age

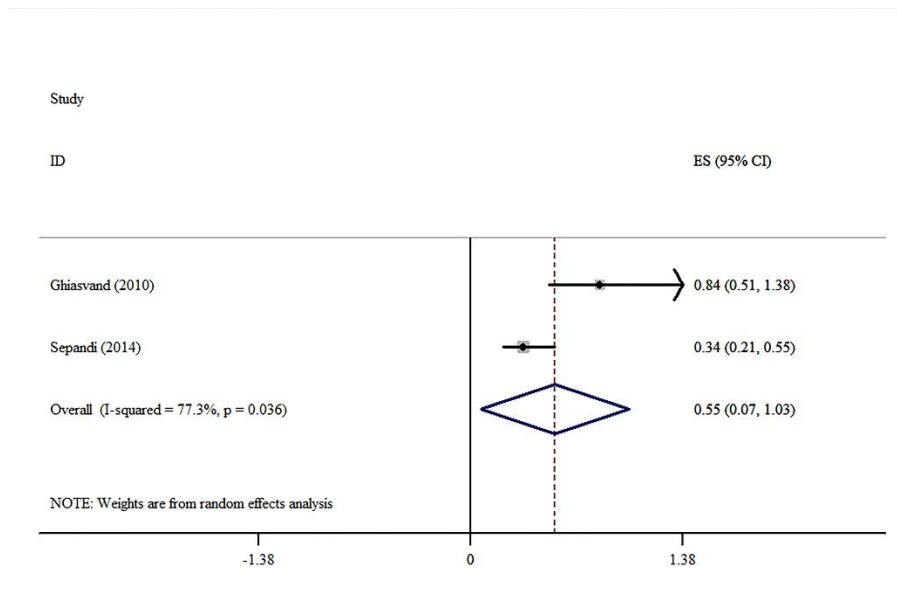

Supplement Figure 6. Forest plot for pooling adjusted odds ratio of menarche age between 12 to 15 years

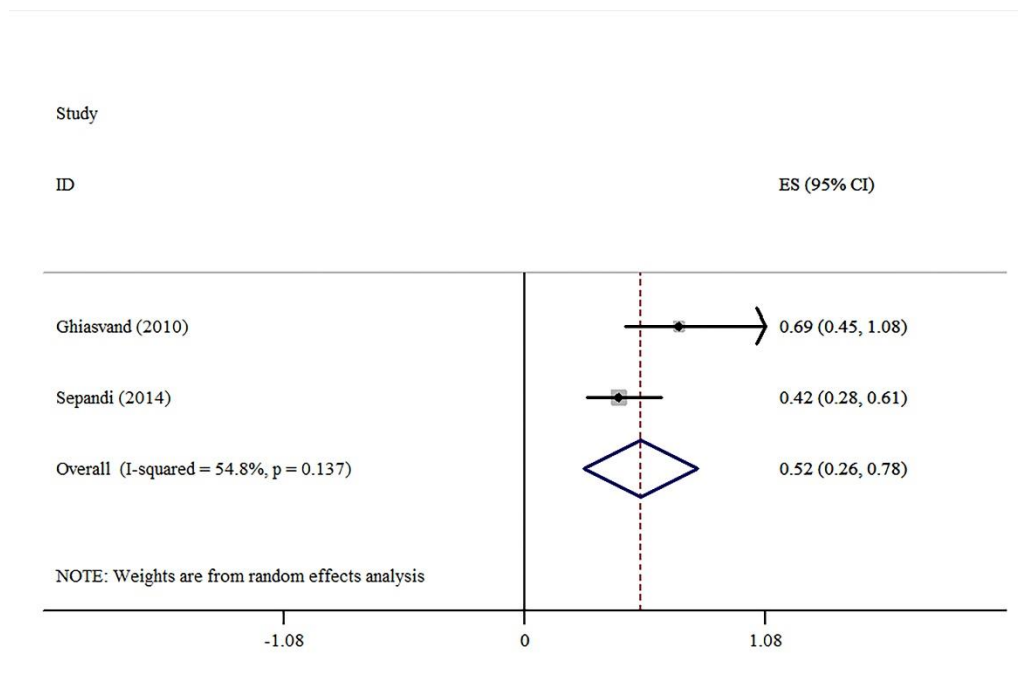

Supplement Figure 7. Forest plot for pooling odds ratio of menarche age between 12 to 15 years

## Menarche age

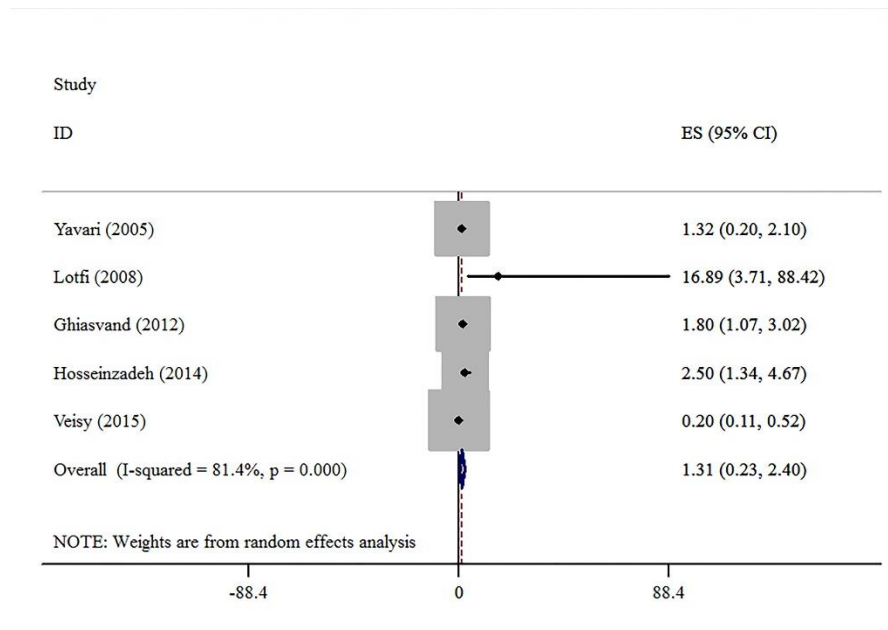

Supplement Figure 8. Forest plot for pooling odds ratio of menarche age less than 12 years

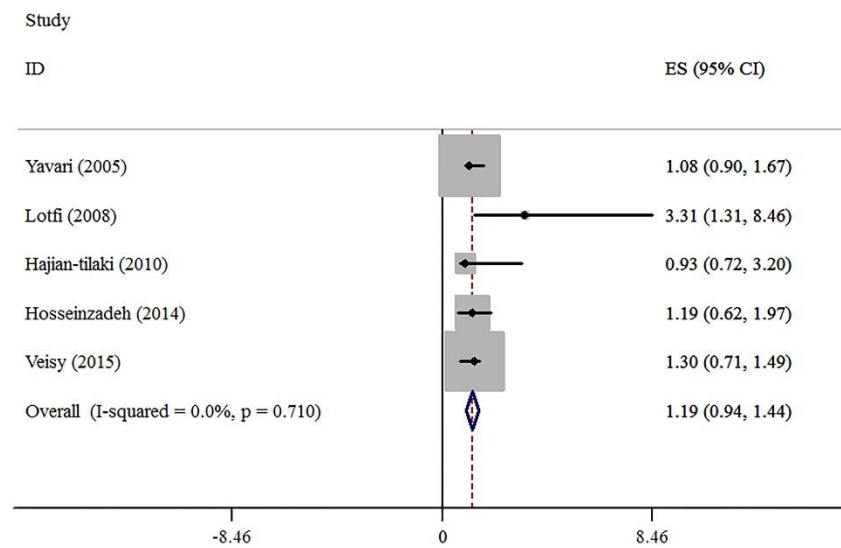

Supplement Figure 9. Forest plot for pooling odds ratio of menarche age less than 13 years

## Menarche age

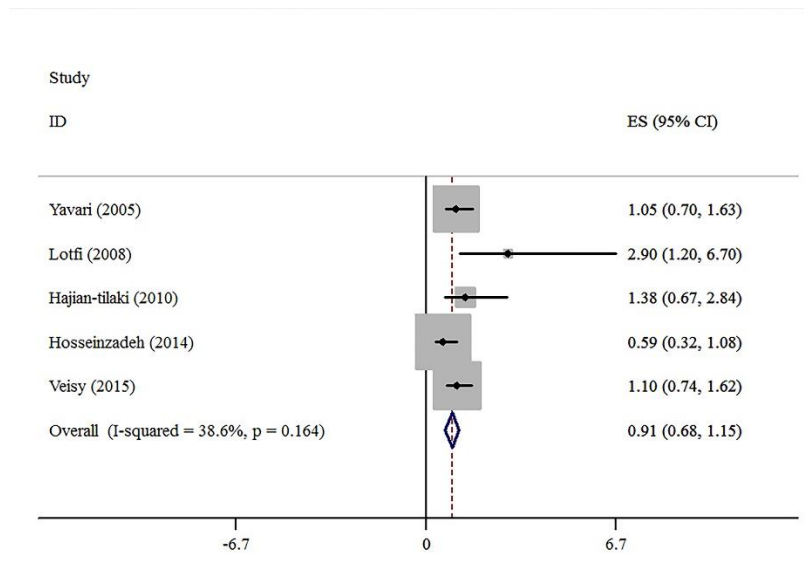

Supplement Figure 10. Forest plot for pooling odds ratio of menarche age less than 14 years

## Menarche age

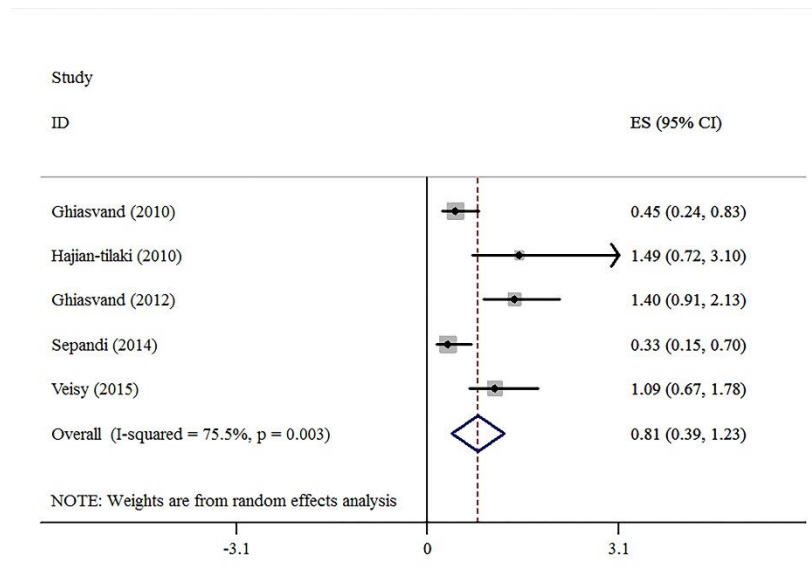

Supplement Figure 11. Forest plot for pooling odds ratio of menarche age more than 15 years

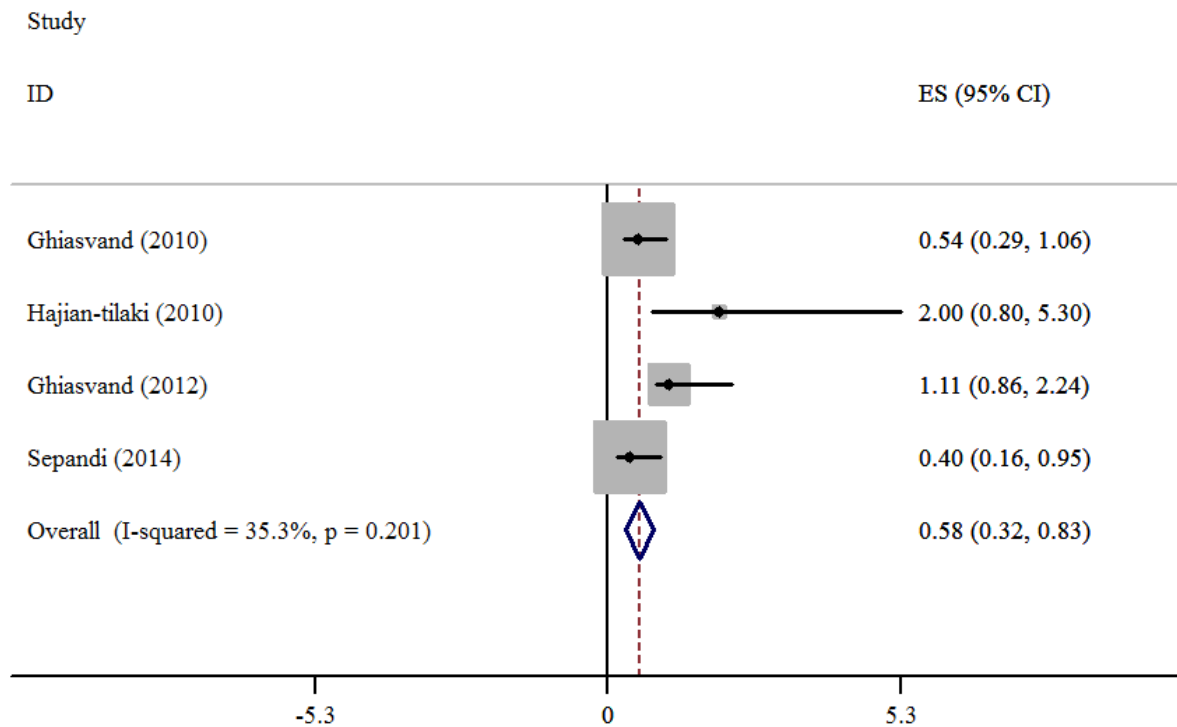

Supplementary Figure 12. Forest plot for pooling adjusted odds ratio of menarche age more than 15 years





Body mass index

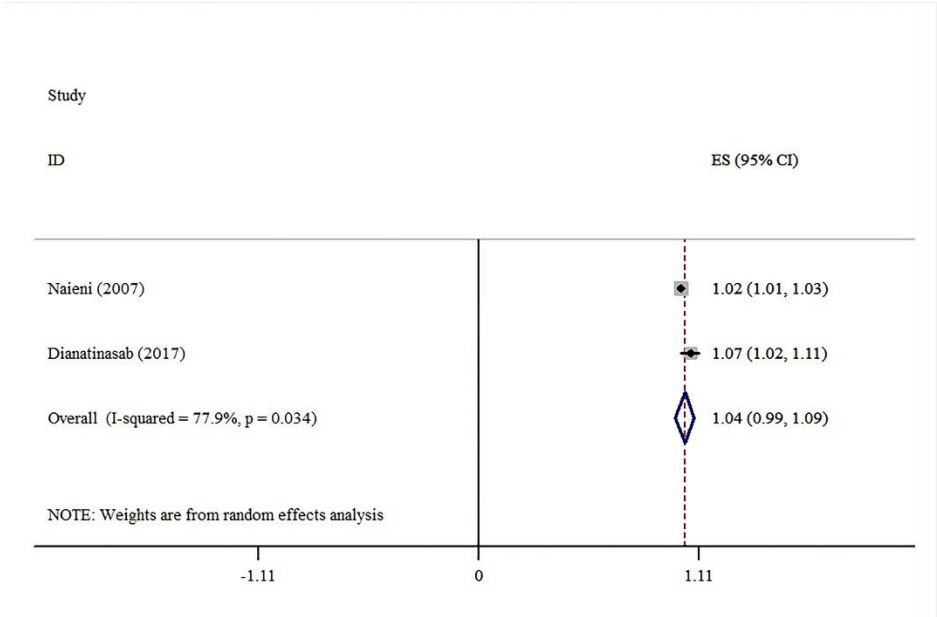

Supplement Figure 13. Forest plot for pooling adjusted odds ratio of body mass index

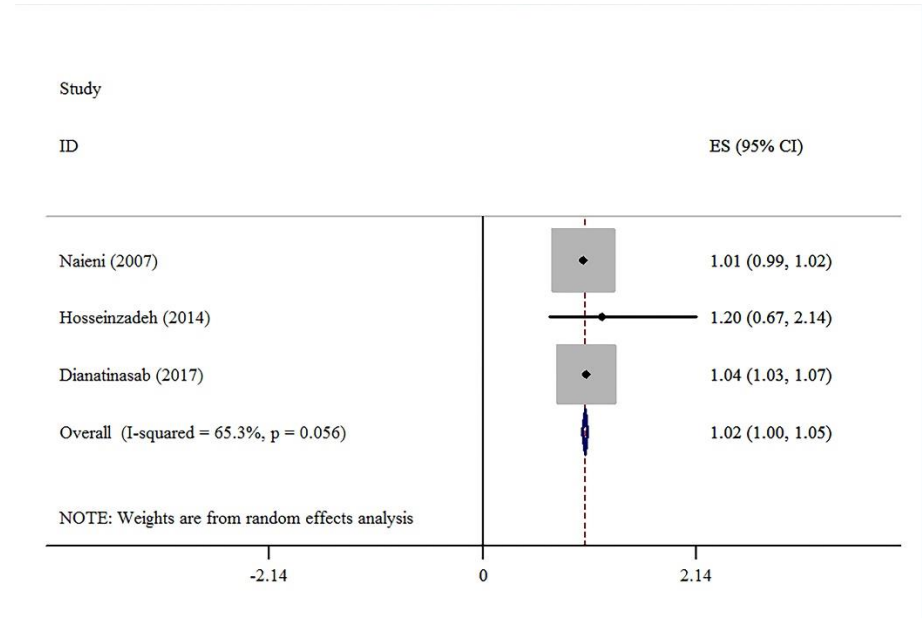

Supplement Figure 14. Forest plot for pooling odds ratio of body mass index

## Body mass index

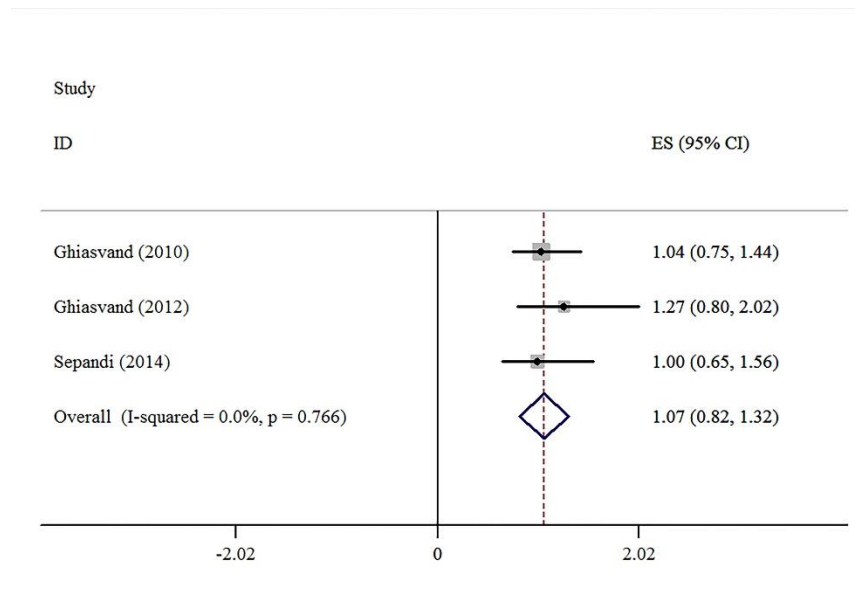

Supplement Figure 15. Forest plot for pooling adjusted odds ratio of body mass index between 25-29.9

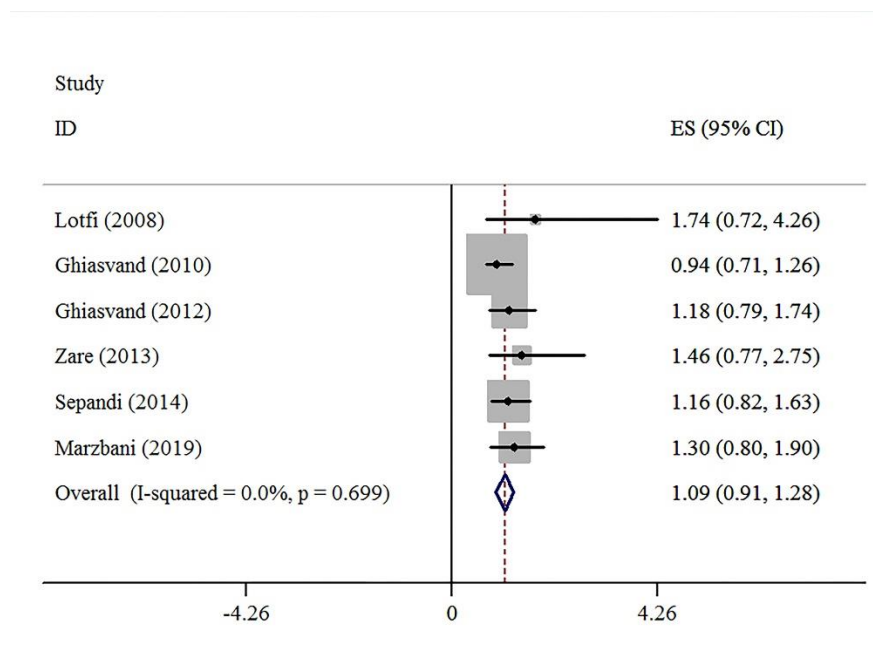

Supplement Figure 16. Forest plot for pooling odds ratio of body mass index between 25-29.9

### Body mass index

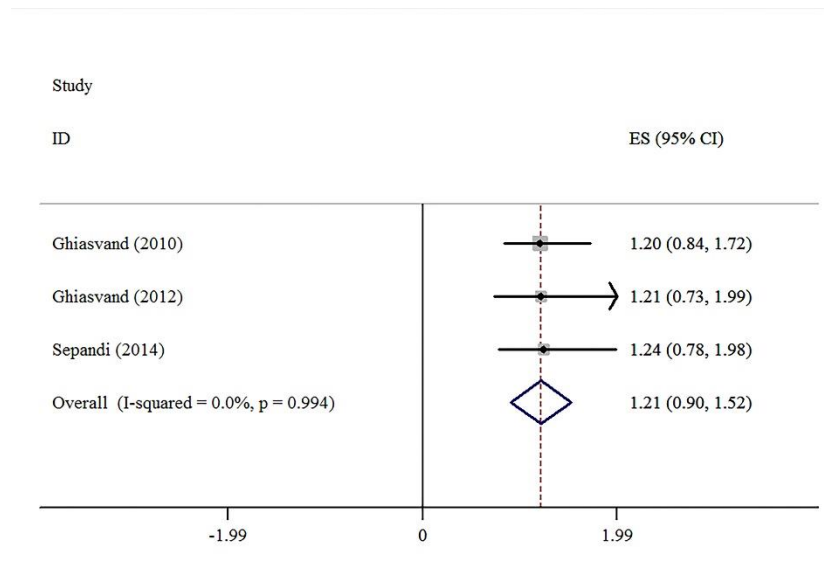

Supplement Figure 17. Forest plot for pooling adjusted odds ratio of body mass index more than 30

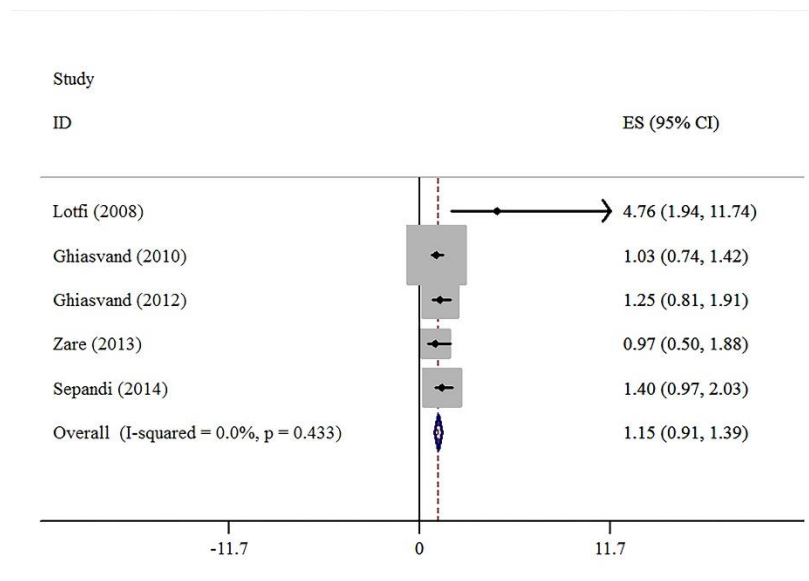

Supplement Figure 18. Forest plot for pooling odds ratio of body mass index more than 30

## Relationship status

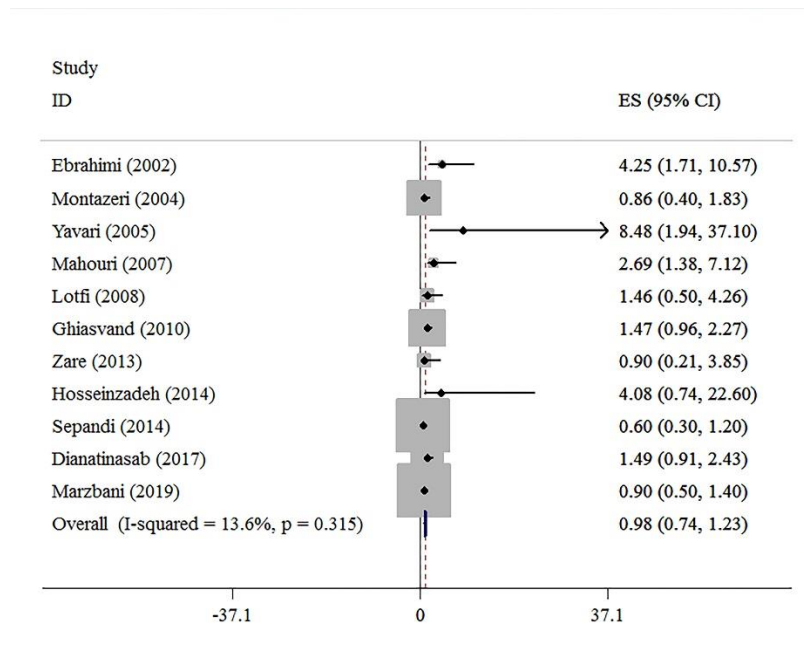

Supplement Figure 19. Forest plot for pooling odds ratio of single relationship status

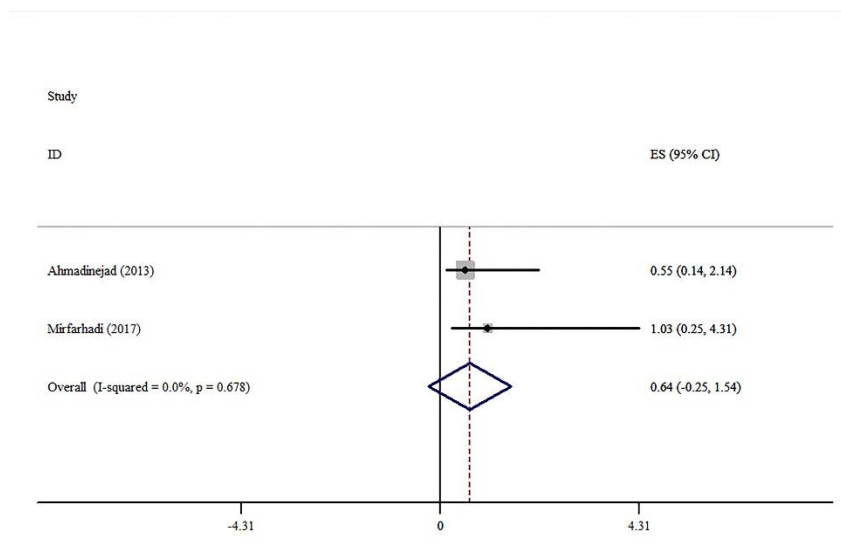

Supplement Figure 20. Forest plot for pooling odds ratio of married relationship status

## Relationship status

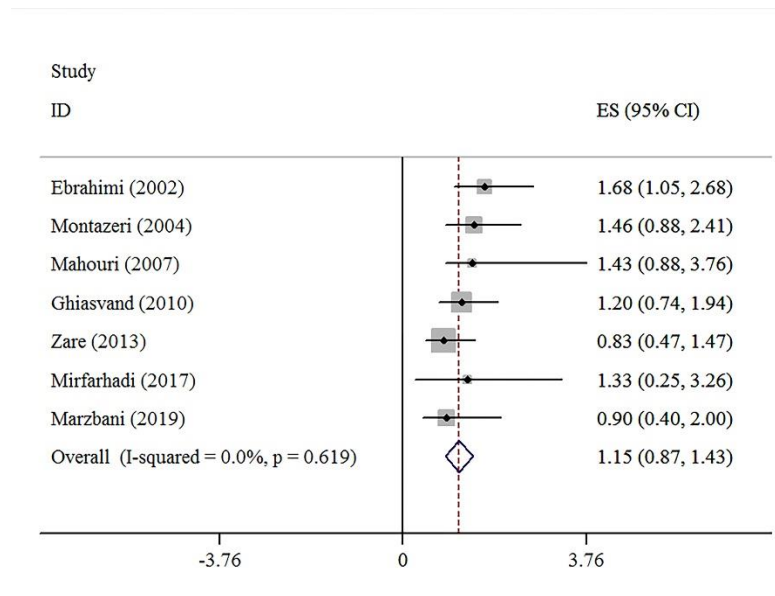

Supplement Figure 21. Forest plot for pooling odds ratio of divorced relationship status

## Education Level

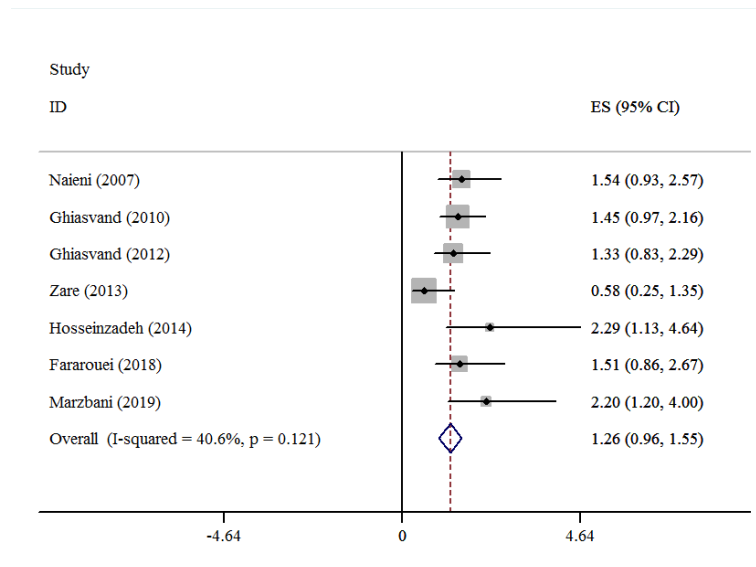

Supplement Figure 22. Forest plot for pooling odds ratio of basic education level

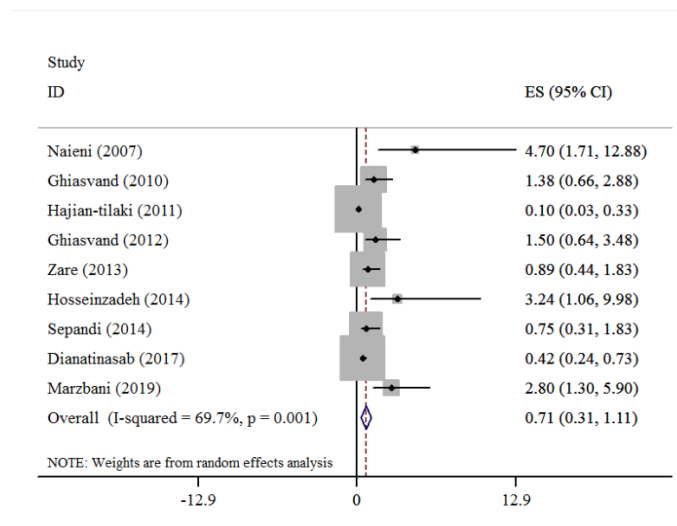

Supplement Figure 123. Forest plot for pooling odds ratio of academic education level

Stress conditions

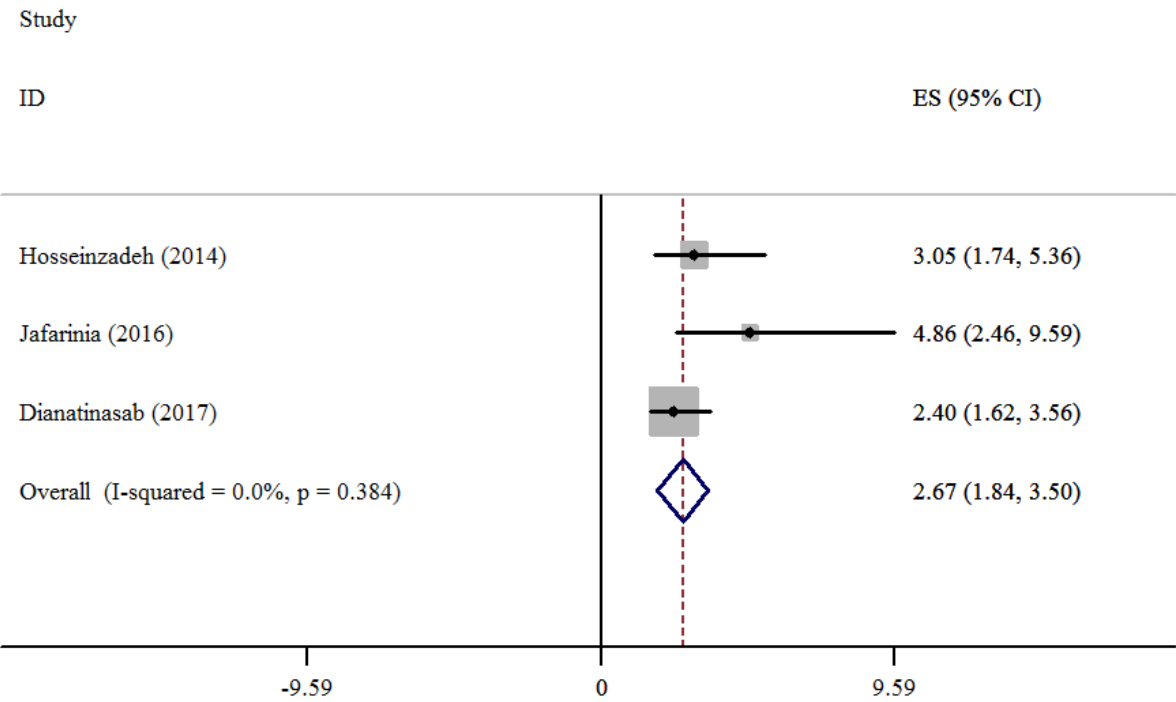

Supplementary Figure 24. Forest plot for pooling adjusted odds ratio of stress conditions experience

Smoking status

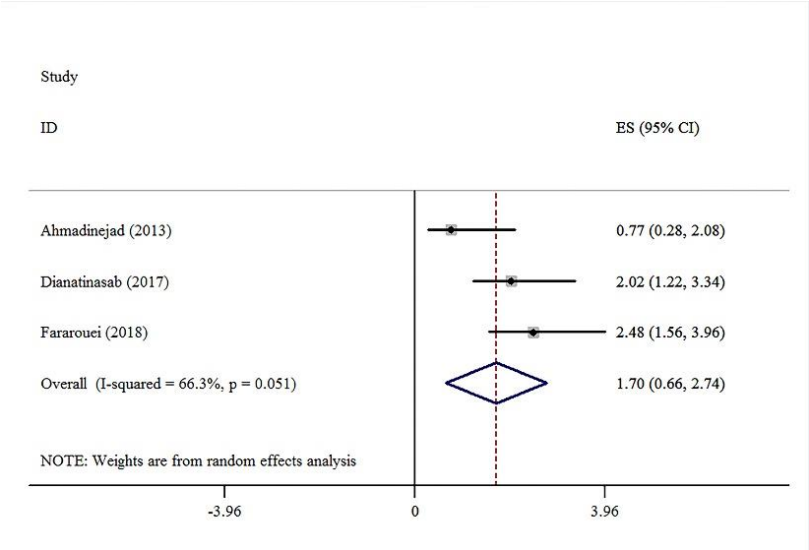

Supplement Figure 135. Forest plot for pooling adjusted odds ratio of active smokers

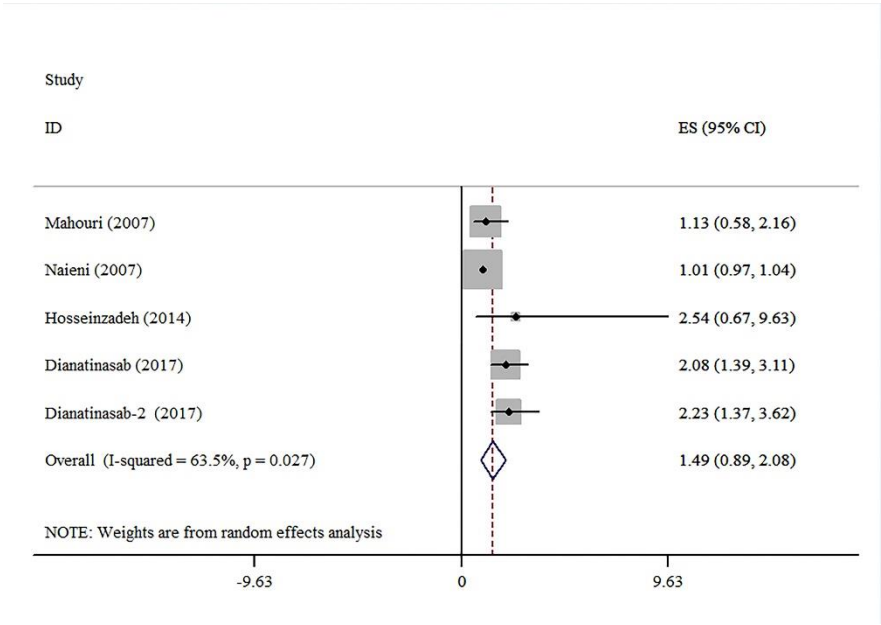

Supplement Figure 146. Forest plot for pooling odds ratio of active smokers



## Smoking status

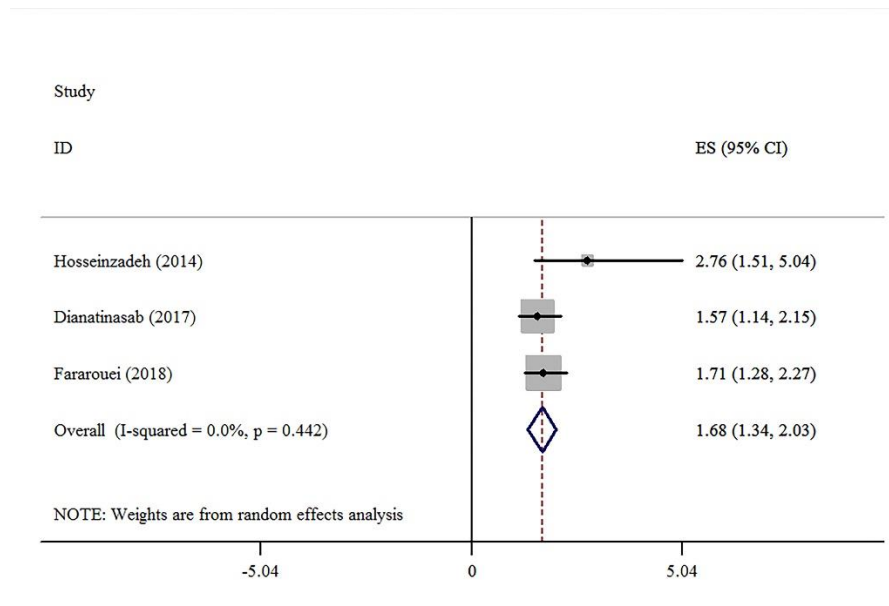

Supplement Figure 157. Forest plot for pooling adjusted odds ratio of passive smokers

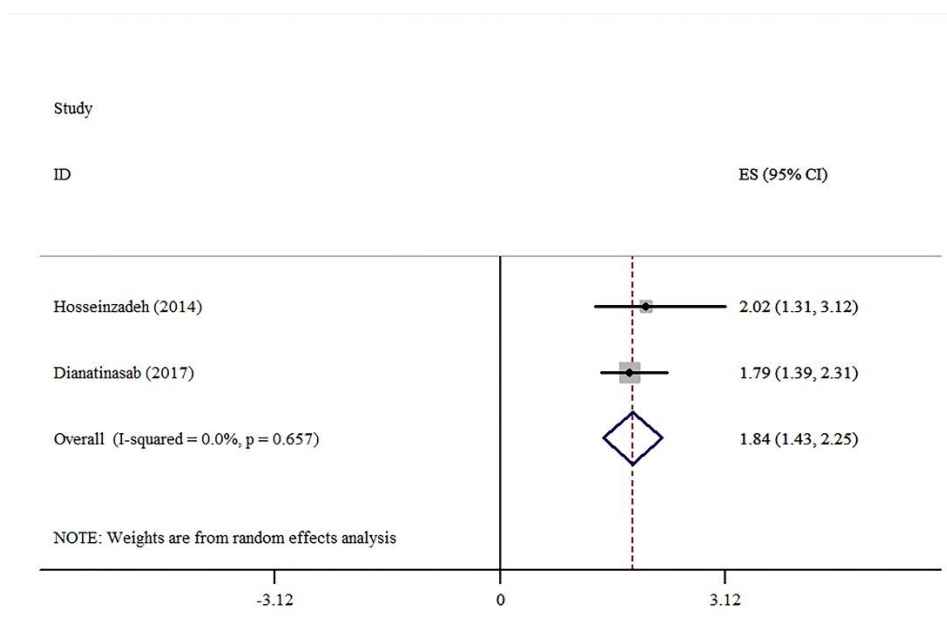

Supplement Figure 168. Forest plot for pooling odds ratio of passive smokers

## Daily exercise

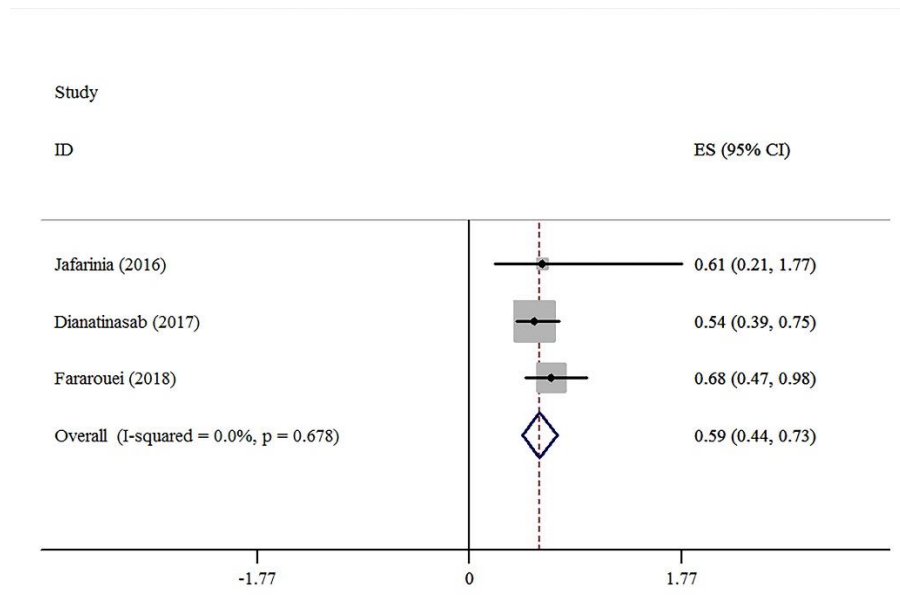

Supplement Figure 179. Forest plot for pooling adjusted odds ratio of daily exercise

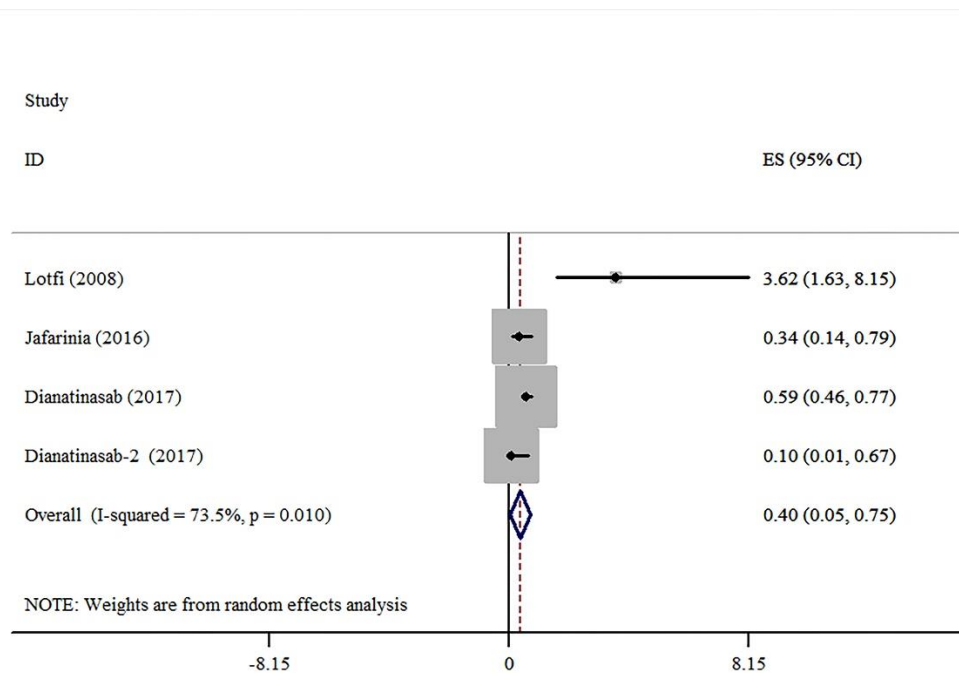

Supplement Figure 30. Forest plot for pooling odds ratio of daily exercise

### *Hormone receptor status*

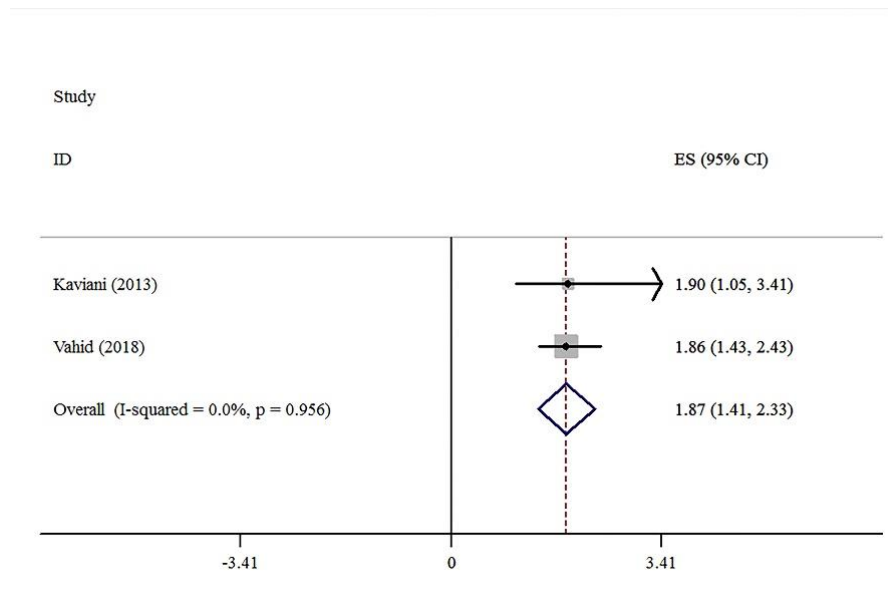

*Supplement Figure 31. Forest plot for pooling odds ratio of ER positive status*

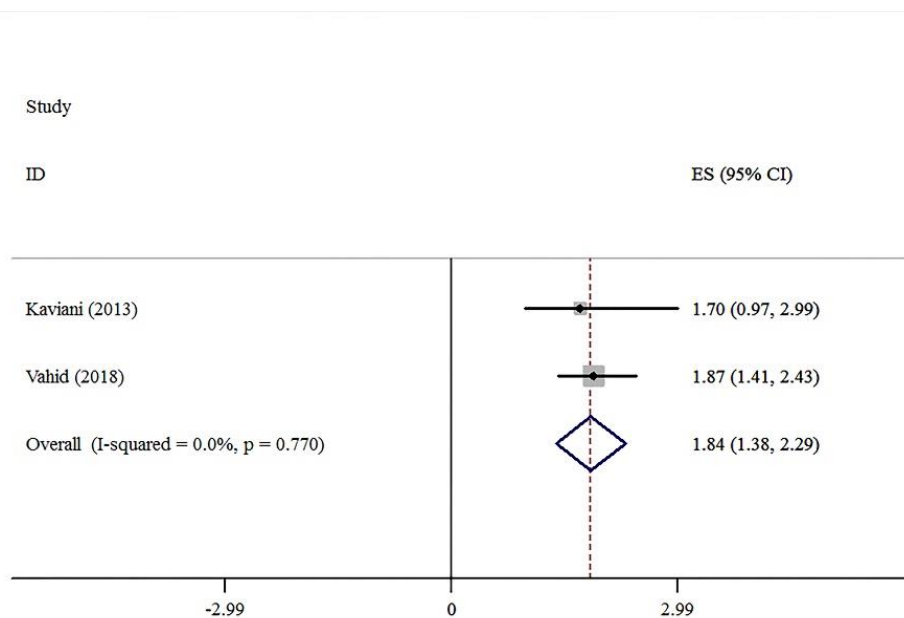

*Supplement Figure 32. Forest plot for pooling odds ratio of PR positive status*

## Menopausal status

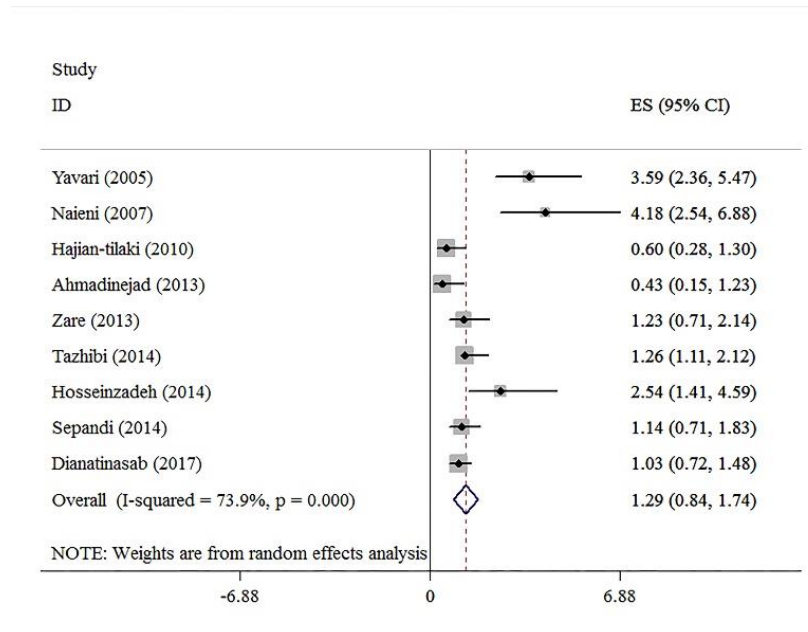

Supplement Figure 33. Forest plot for pooling adjusted odds ratio of menopausal status

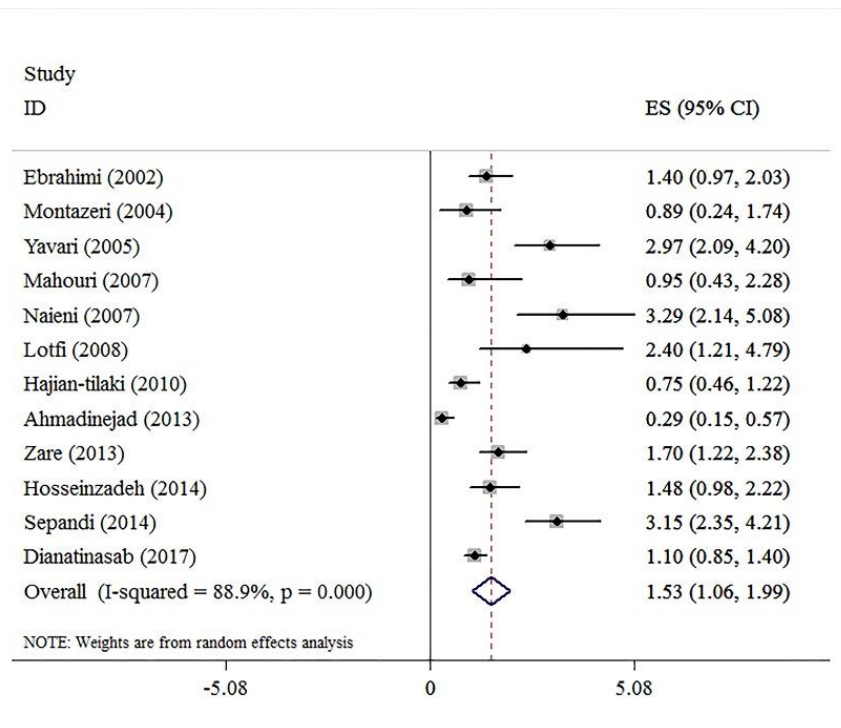

Supplement Figure 34. Forest plot for pooling odds ratio of menopausal status

# *Hormone replacement therapy*

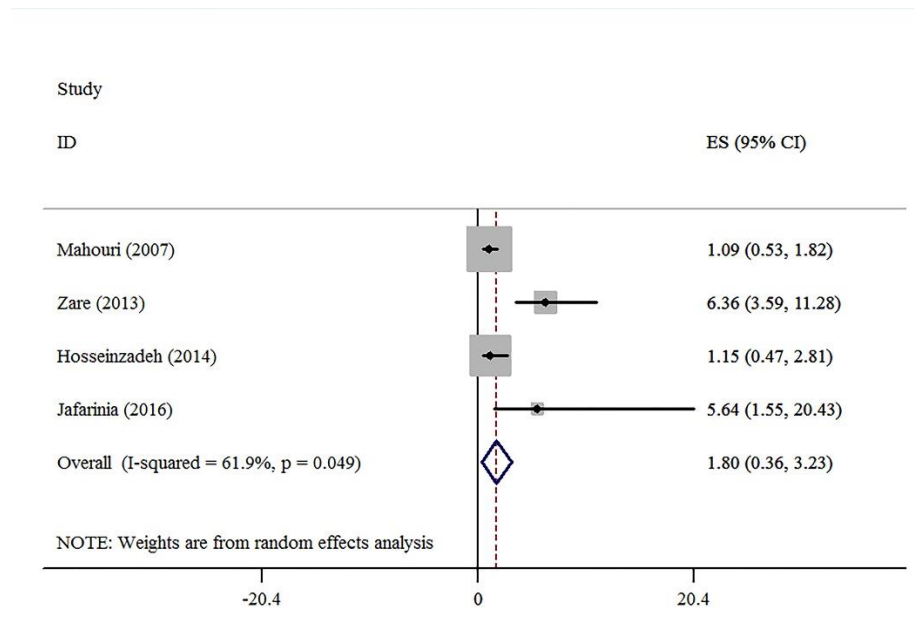

*Supplement Figure 35. Forest plot for pooling odds ratio of hormone replacement therapy*

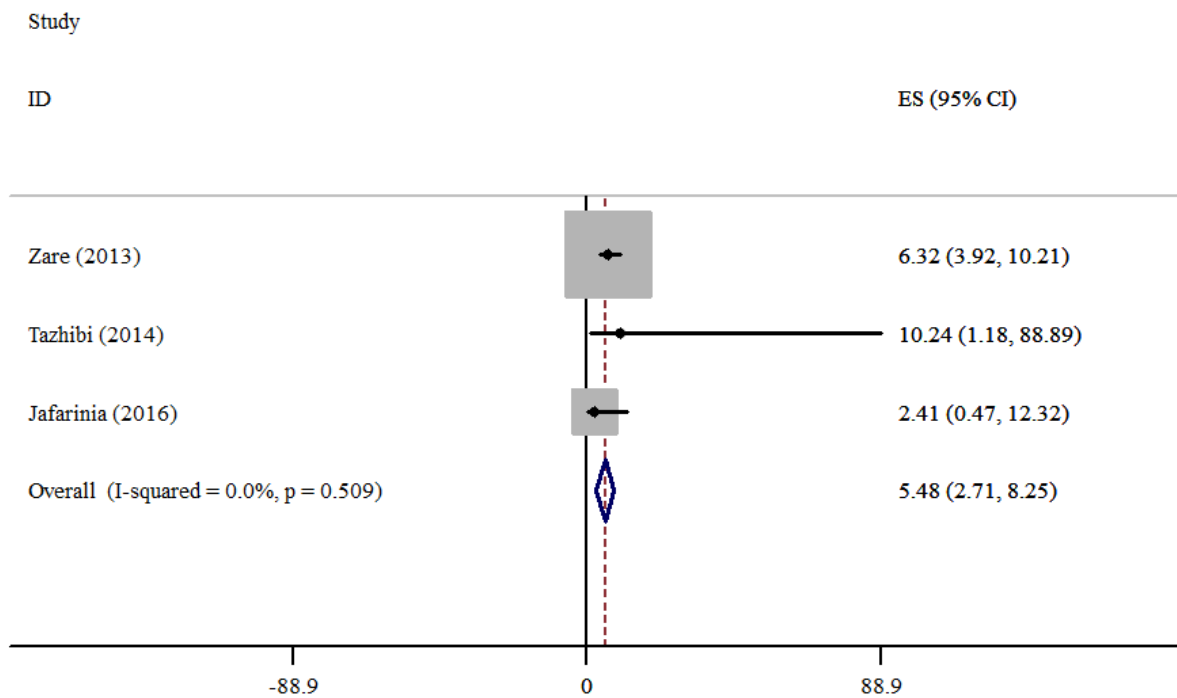

*Supplement Figure 36. Forest plot for pooling adjusted odds ratio of hormone replacement therapy*

## Oral contraceptive

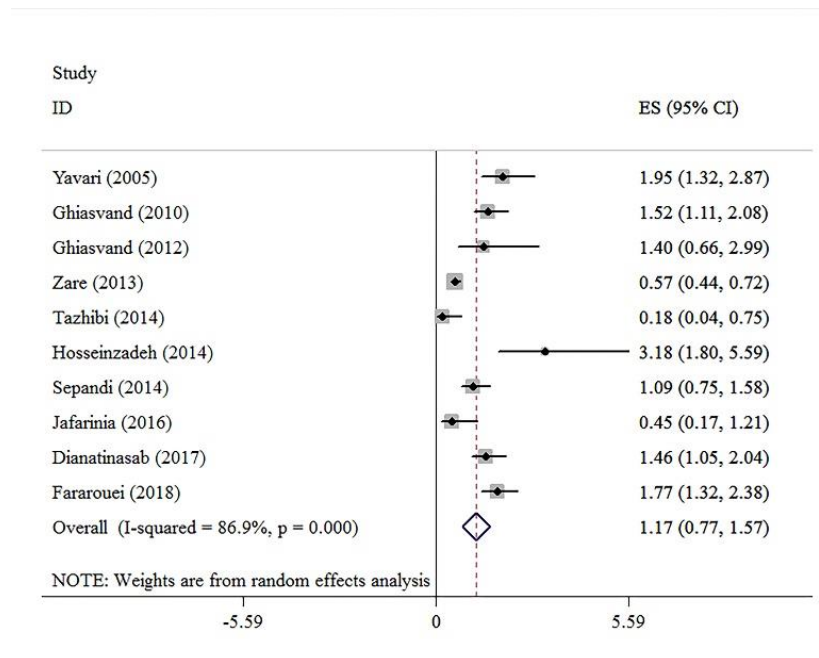

Supplement Figure 37. Forest plot for pooling adjusted odds ratio of oral contraceptive consumption

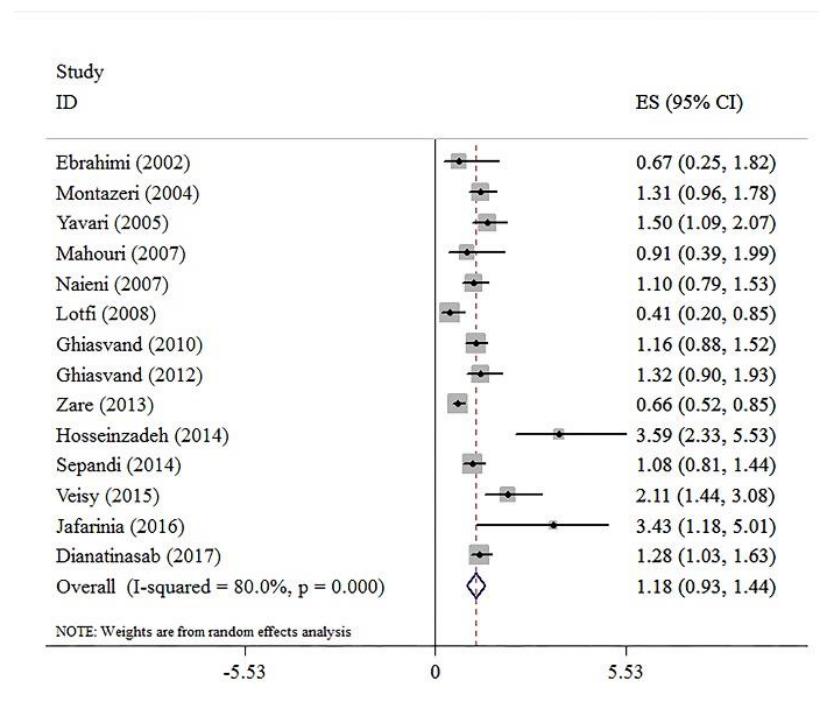

Supplement Figure 38. Forest plot for pooling odds ratio of oral contraceptive consumption

*Birth giving status*

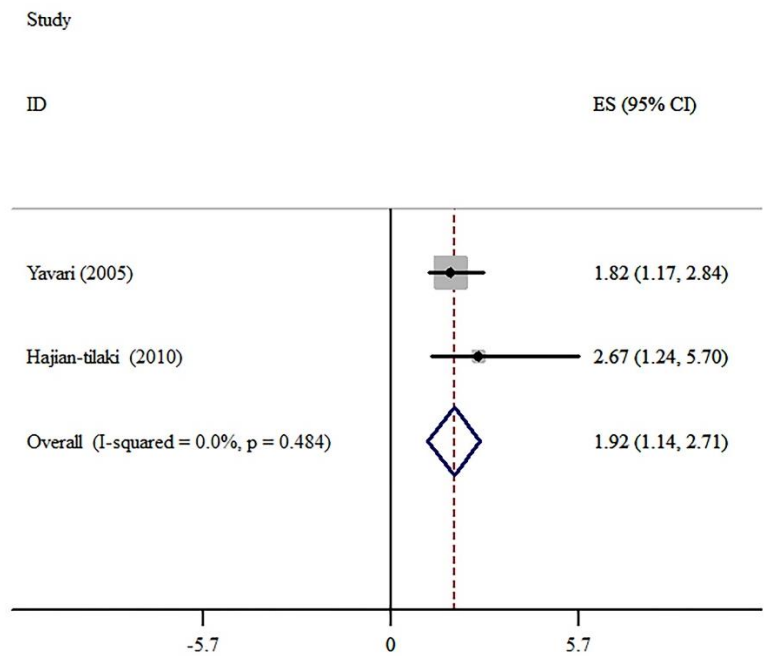

*Supplement Figure 39. Forest plot for pooling adjusted odds ratio of full-term pregnancy between 20 to 24*

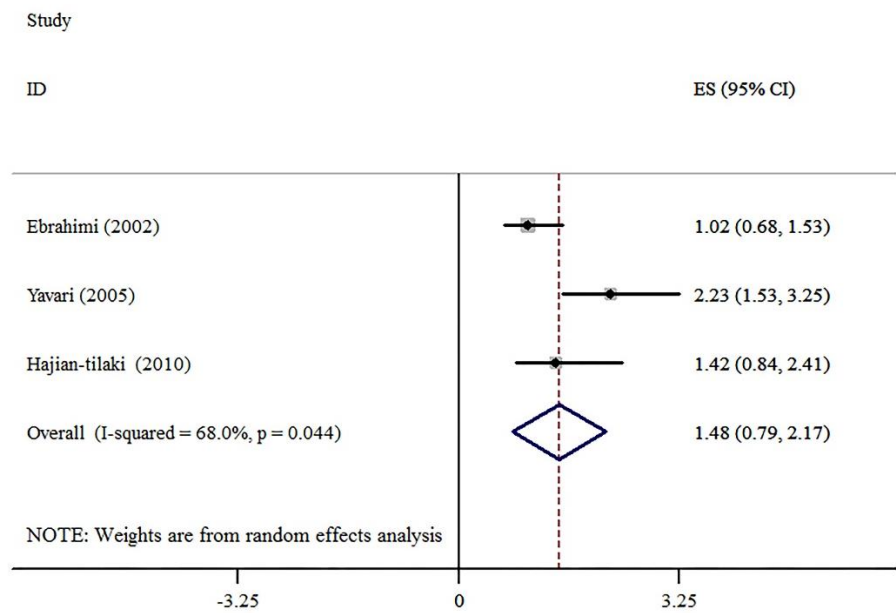

*Supplement Figure 40. Forest plot for pooling odds ratio of full-term pregnancy between 20 to 24*

# *Birth giving status*

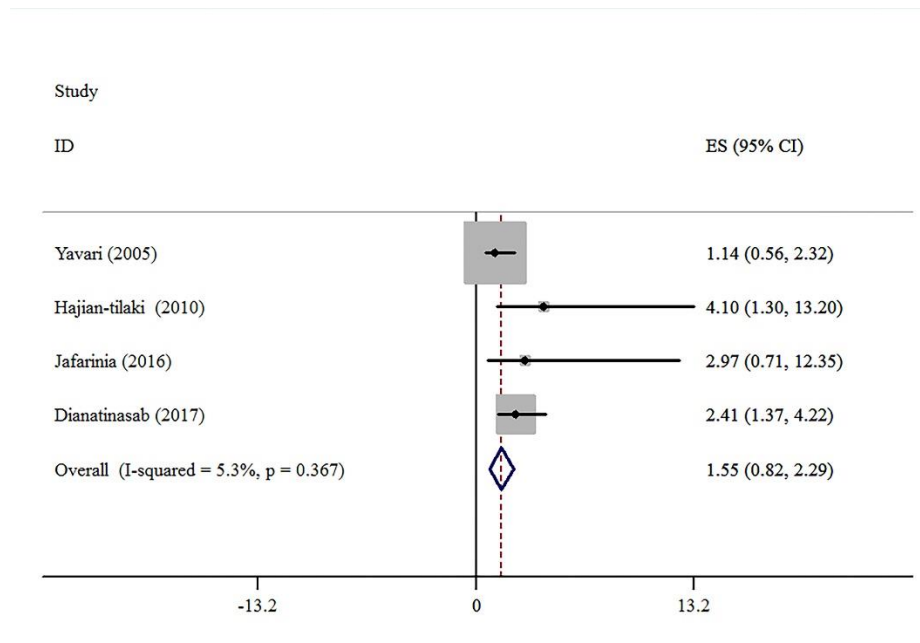

Supplement Figure 41. Forest plot for pooling adjusted odds ratio of full-term pregnancy between 25 to 29

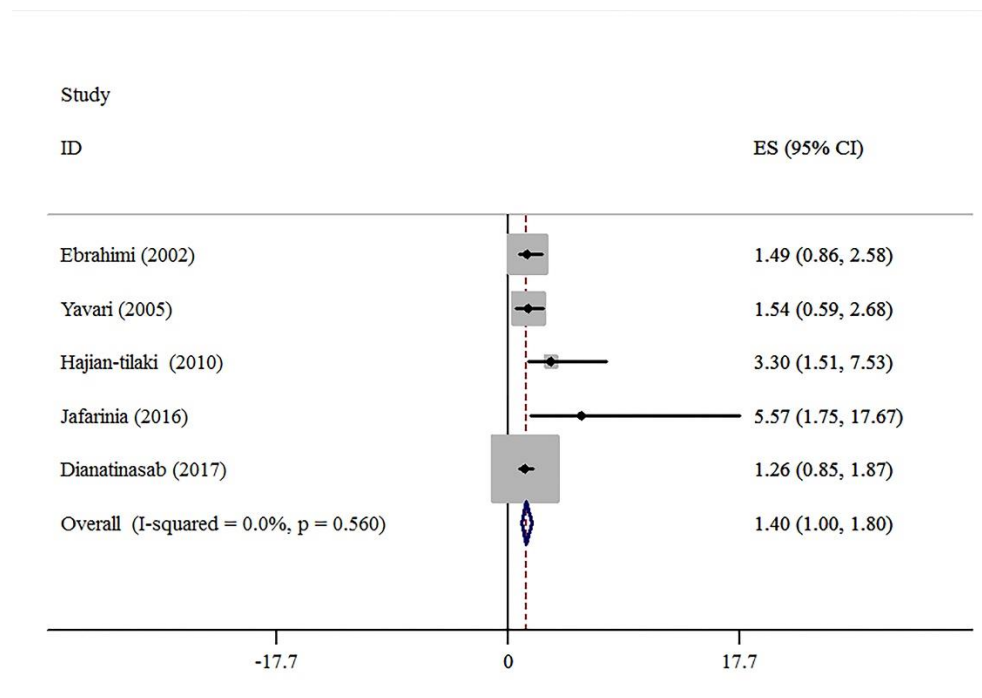

Supplement Figure 42. Forest plot for pooling odds ratio of full-term pregnancy between 25 to 29



# ***Birth giving status***

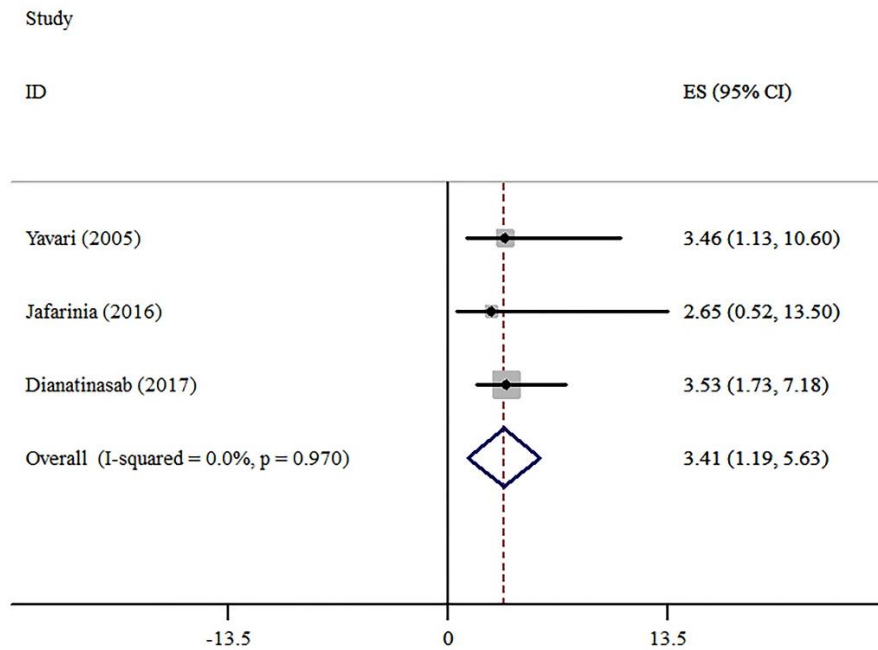

*Supplement Figure 43. Forest plot for pooling adjusted odds ratio of full-term pregnancy at 30*

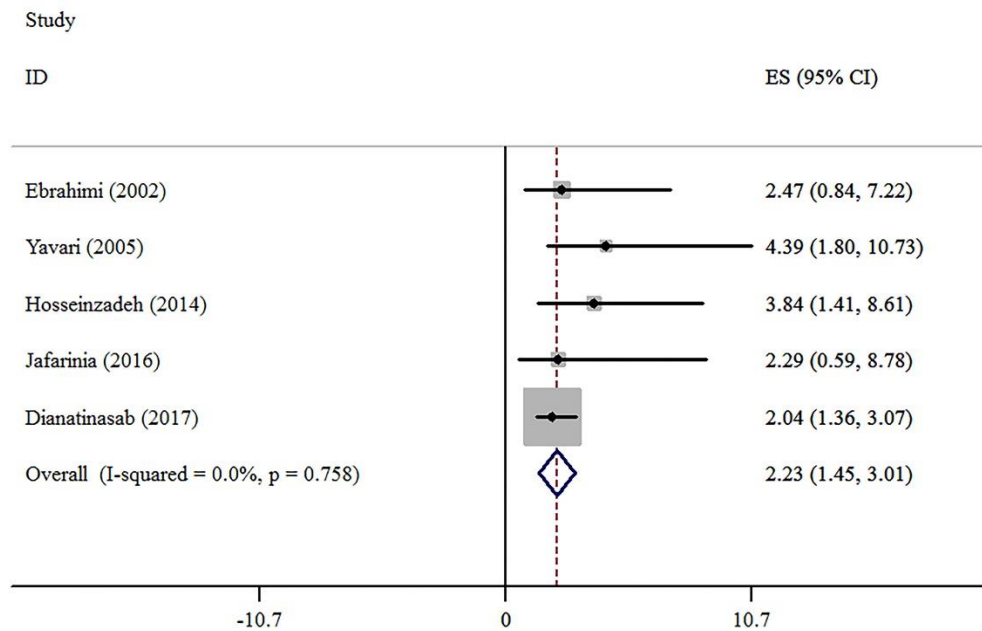

*Supplement Figure 44. Forest plot for pooling odds ratio of full-term pregnancy at 30*

## Birth giving status

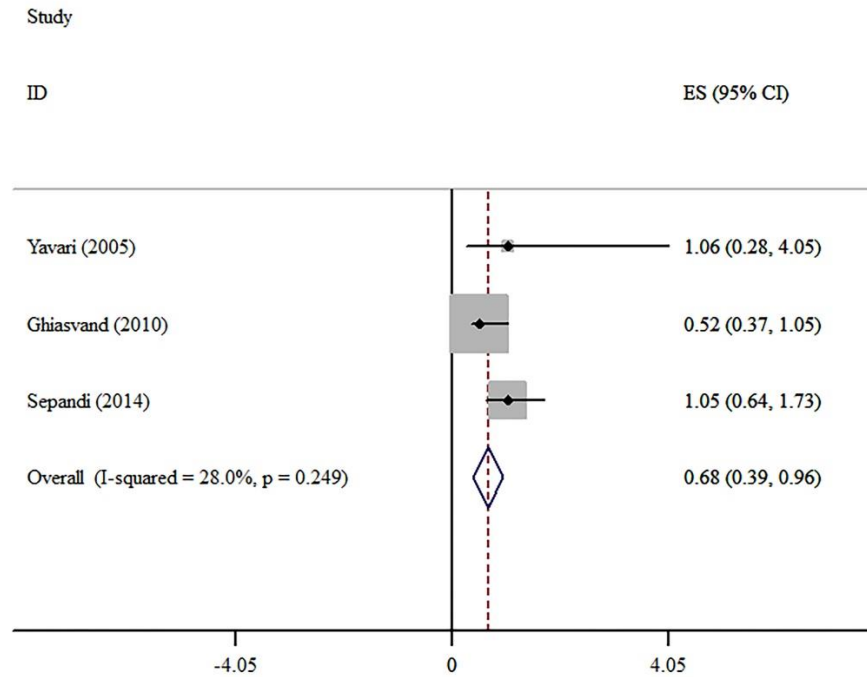

Supplement Figure 45. Forest plot for pooling adjusted odds ratio of nulliparity

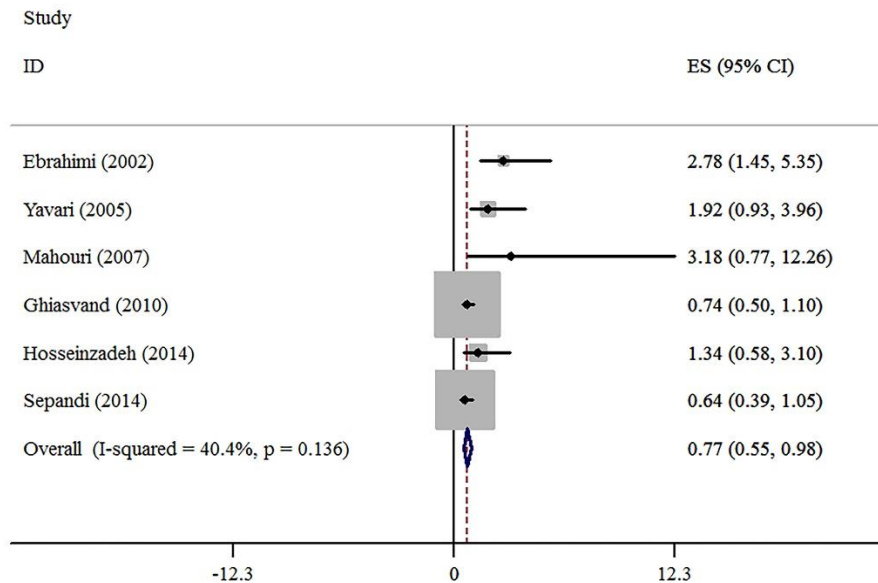

Supplement Figure 46. Forest plot for pooling odds ratio of nulliparity

## Birth giving status

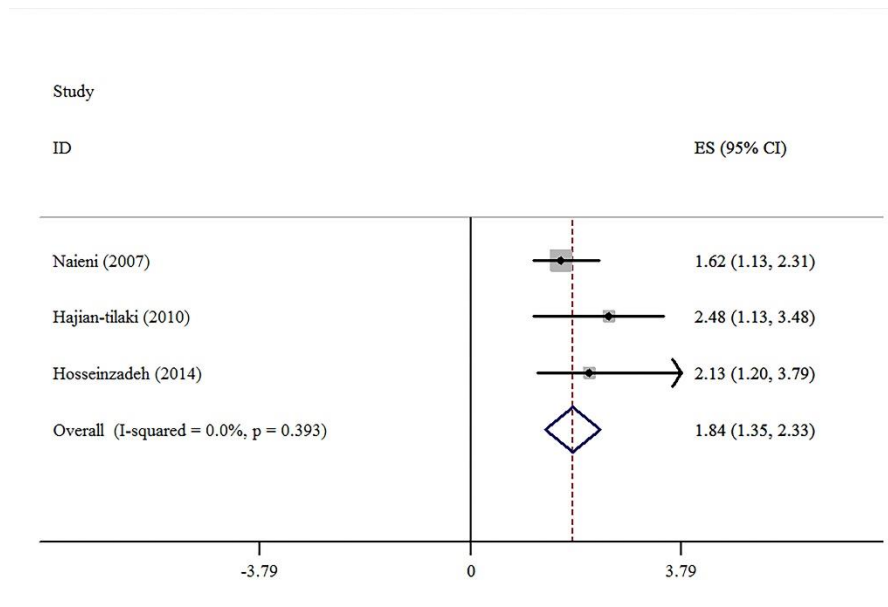

Supplement Figure 47. Forest plot for pooling adjusted odds ratio of abortion history

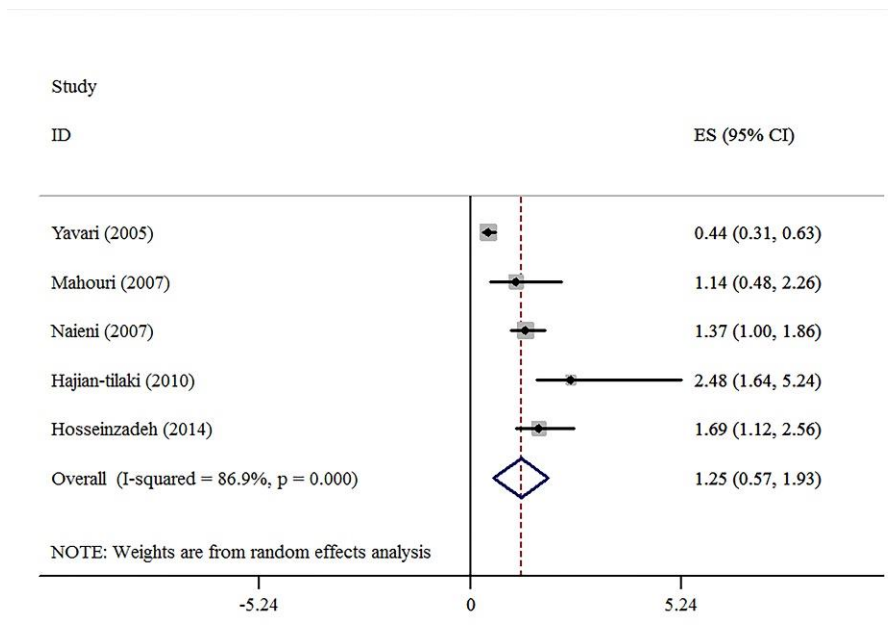

Supplement Figure 48. Forest plot for pooling odds ratio of abortion history

### Benign Breast Conditions

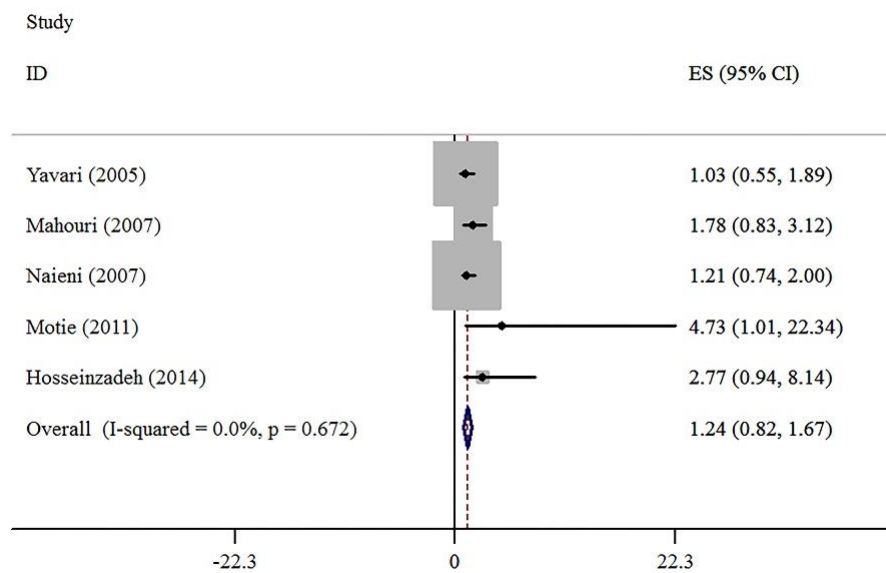

Supplement Figure 49. Forest plot for pooling odds ratio of previous benign breast

## X-ray exposure

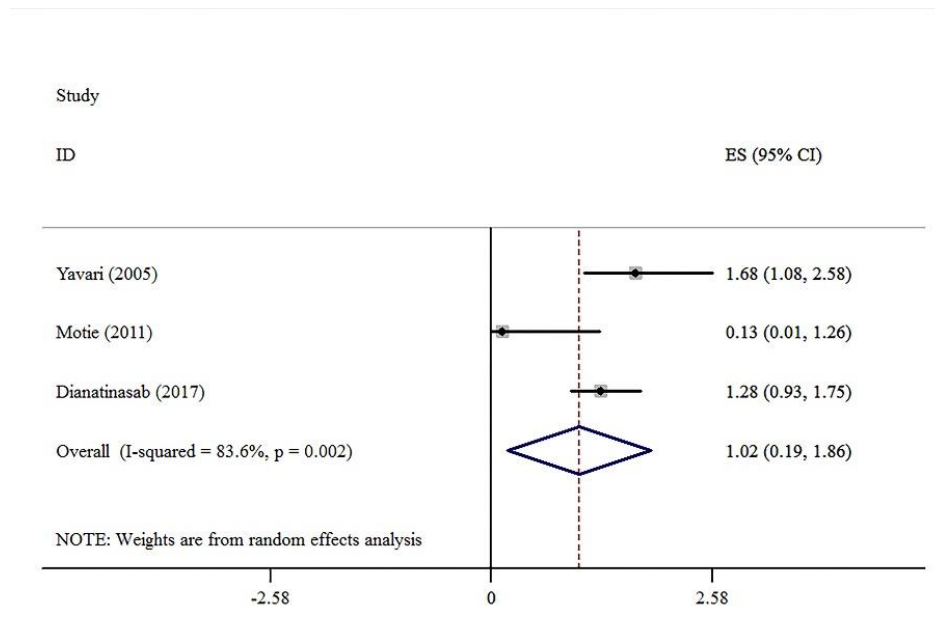

Supplement Figure 50. Forest plot for pooling adjusted odds ratio of X-ray exposure

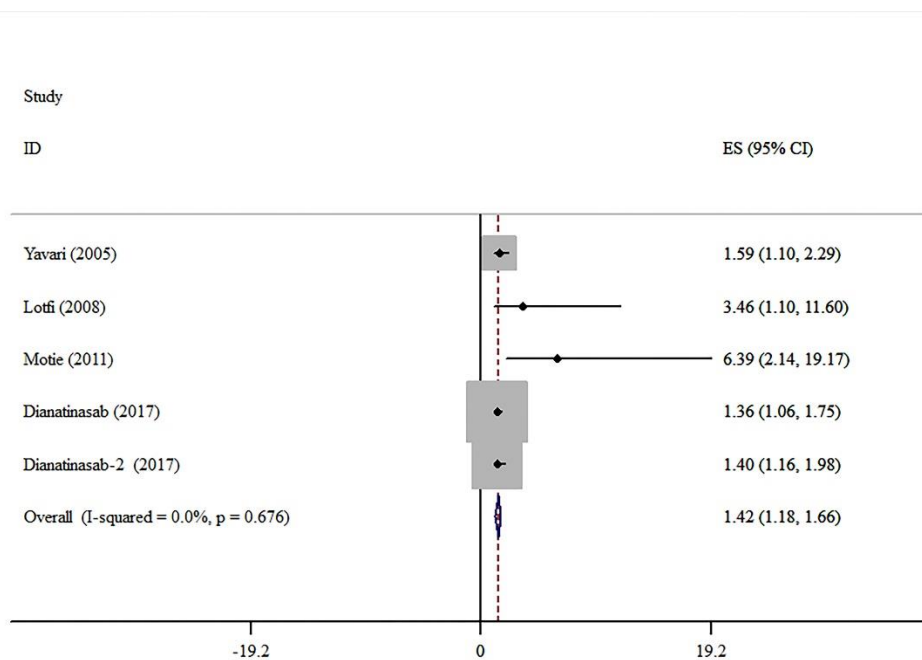

Supplement Figure 51. Forest plot for pooling odds ratio of X-ray exposure

### Breastfeeding duration

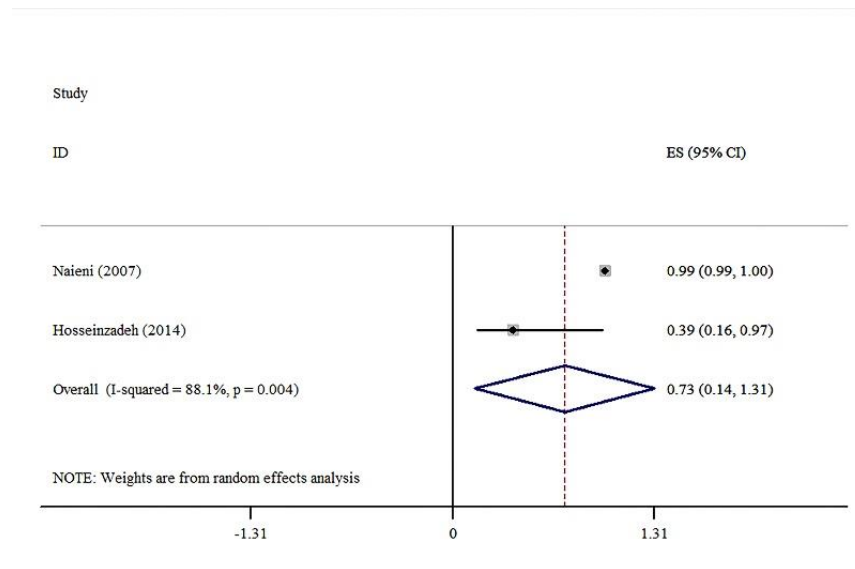

Supplement Figure 52. Forest plot for pooling adjusted odds ratio of breastfeeding duration

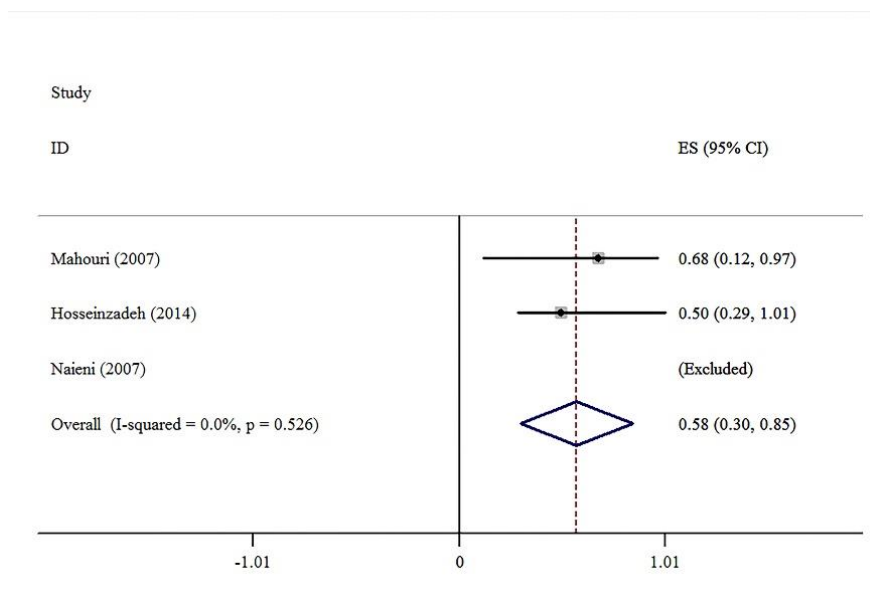

Supplement Figure 53. Forest plot for pooling odds ratio of breastfeeding duration

### Breastfeeding duration

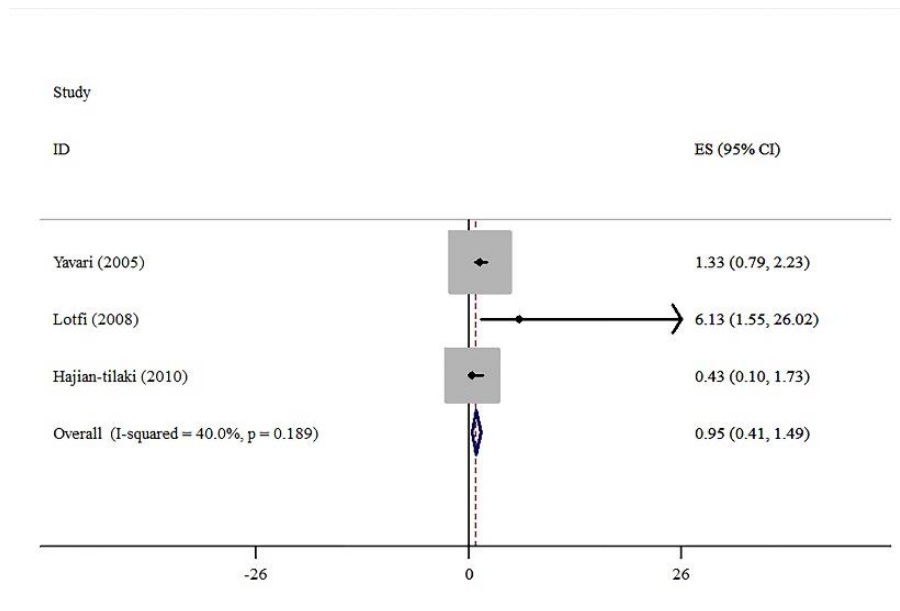

Supplement Figure 54. Forest plot for pooling odds ratio of breastfeeding 1 to 12 months

### Breastfeeding duration

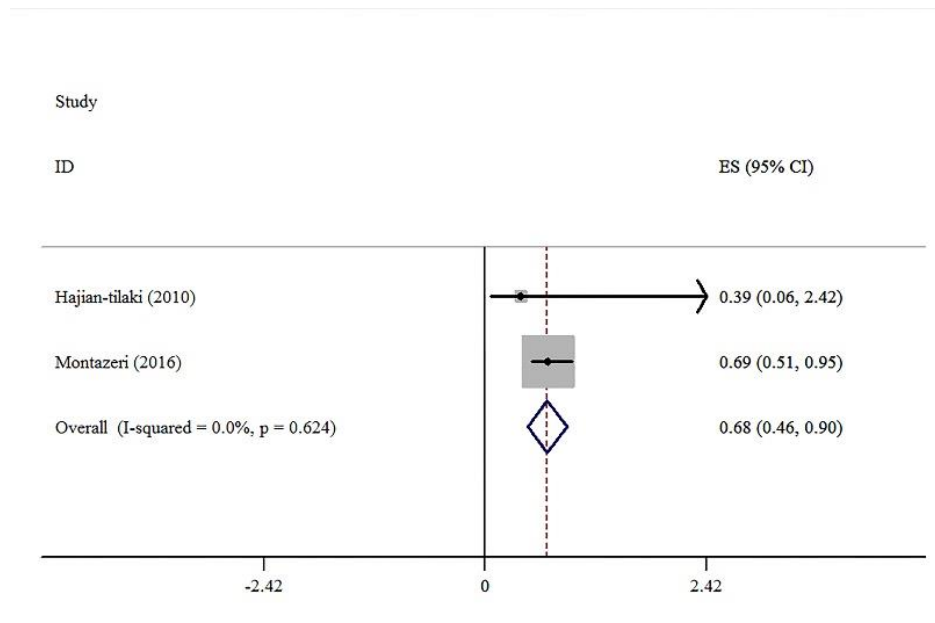

Supplement Figure 55. Forest plot for pooling adjusted odds ratio of breastfeeding 13 to 24 months

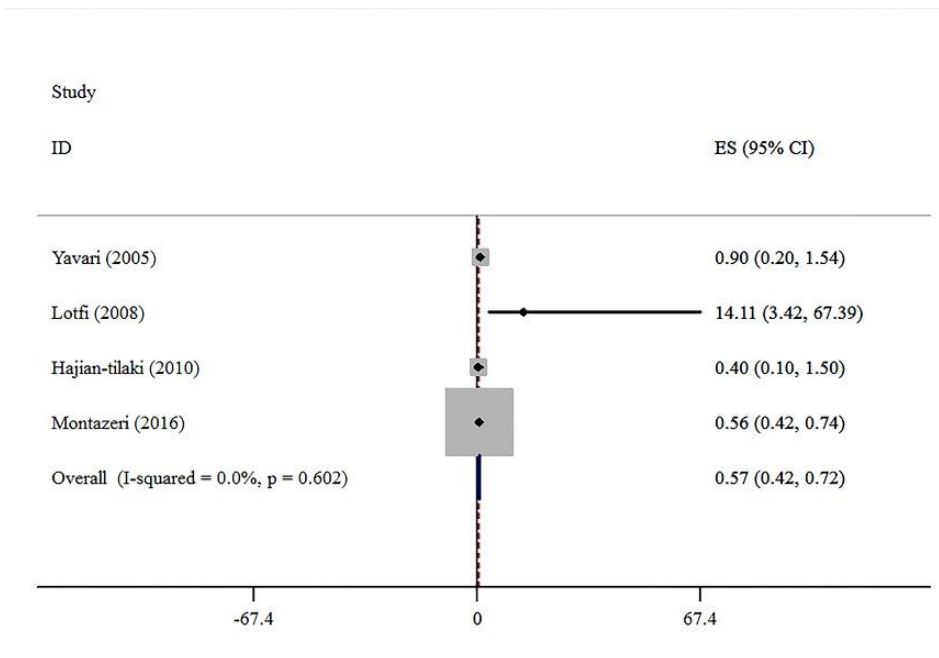

Supplement Figure 56. Forest plot for pooling odds ratio of breastfeeding 13 to 24 months



## Breastfeeding duration

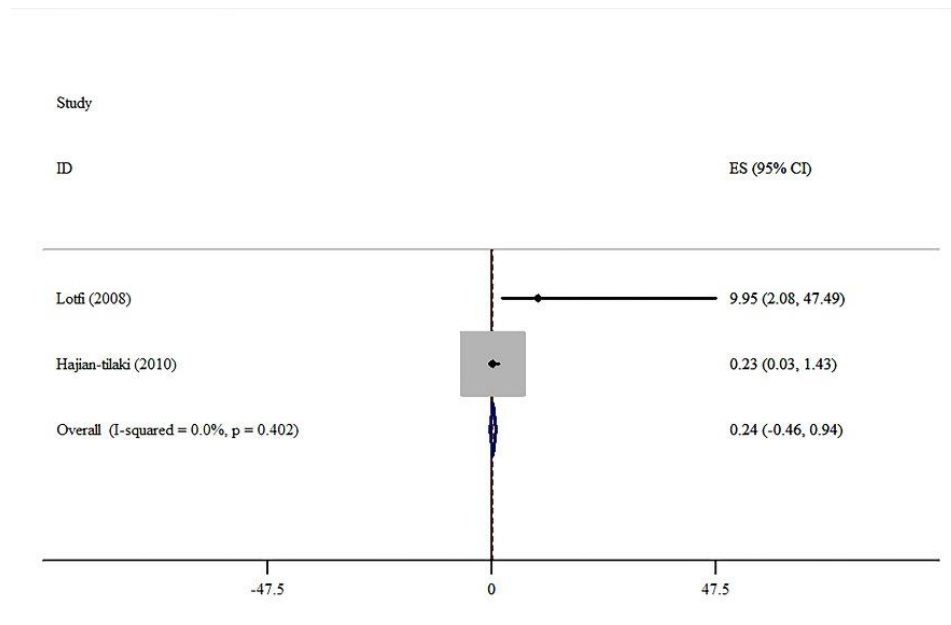

Supplement Figure 57. Forest plot for pooling adjusted odds ratio of breastfeeding 25 to 48 months

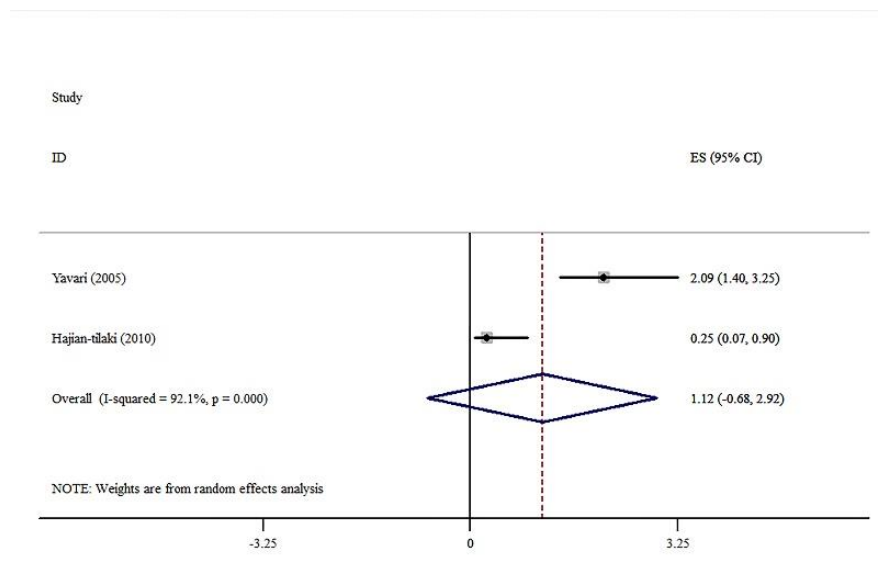

Supplement Figure 58. Forest plot for pooling odds ratio of breastfeeding 25 to 48 months

### Breastfeeding duration

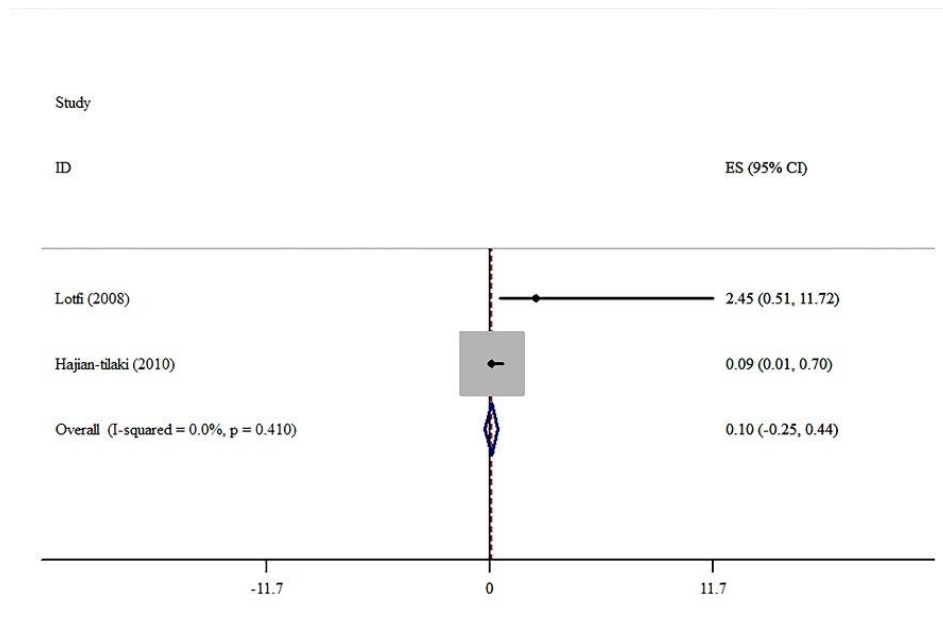

Supplement Figure 59. Forest plot for pooling adjusted odds ratio of breastfeeding more than 49 months

## Dietary status

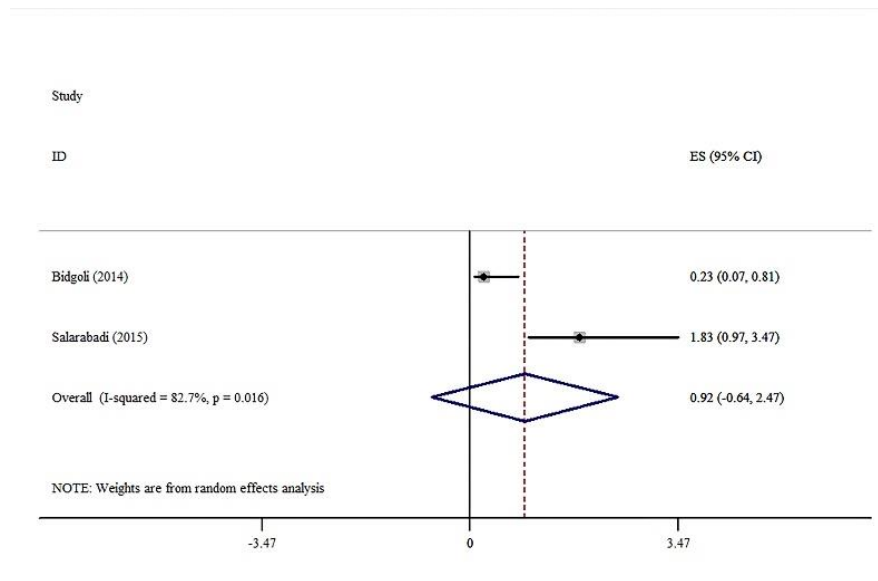

Supplement Figure 60. Forest plot for pooling odds ratio of egg consumption

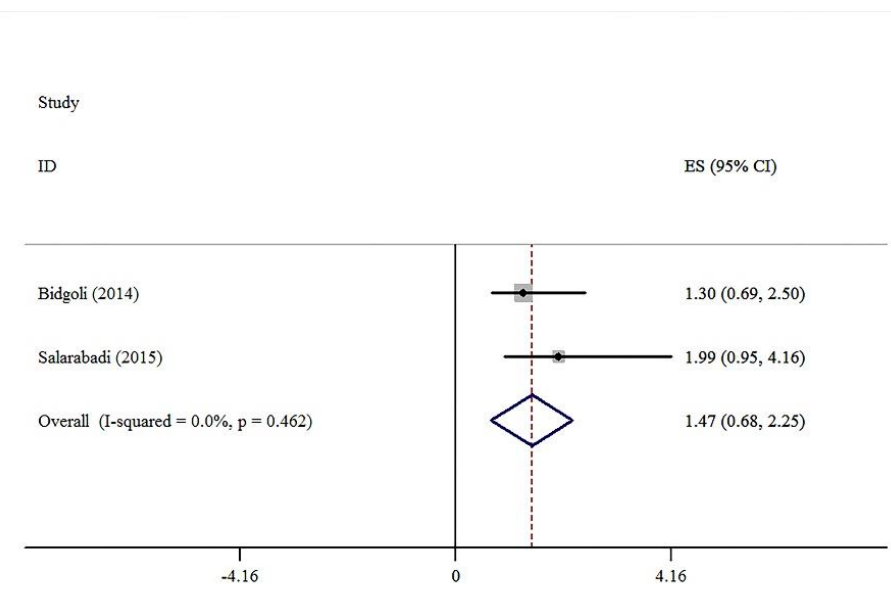

Supplement Figure 61. Forest plot for pooling odds ratio of fish consumption

## Dietary status

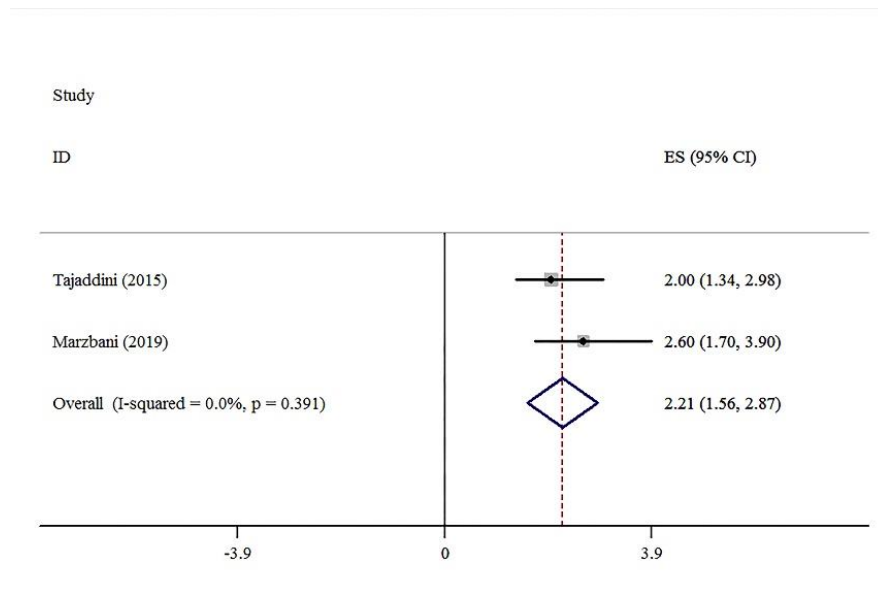

Supplement Figure 62. Forest plot for pooling adjusted odds ratio of sweets consumption

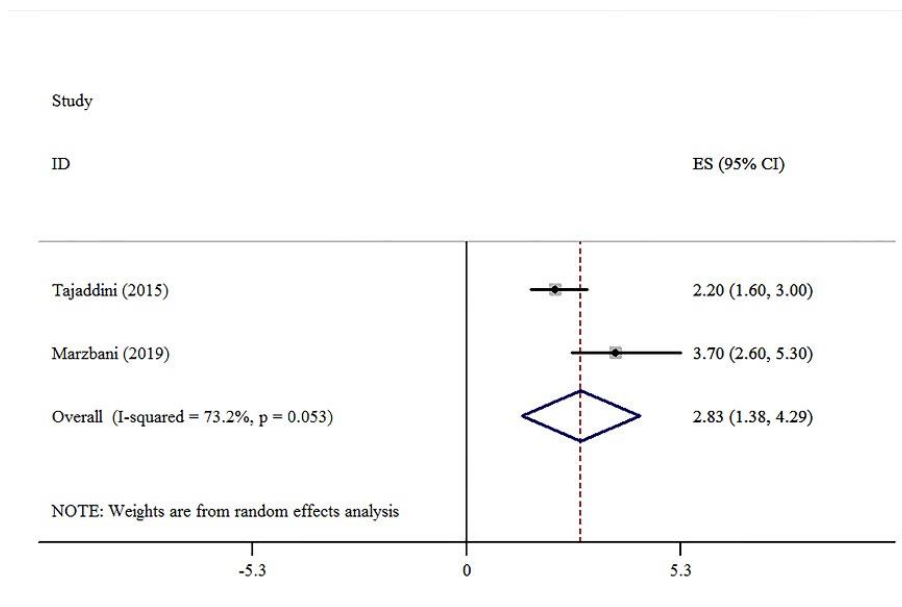

Supplement Figure 63. Forest plot for pooling odds ratio of sweets consumption

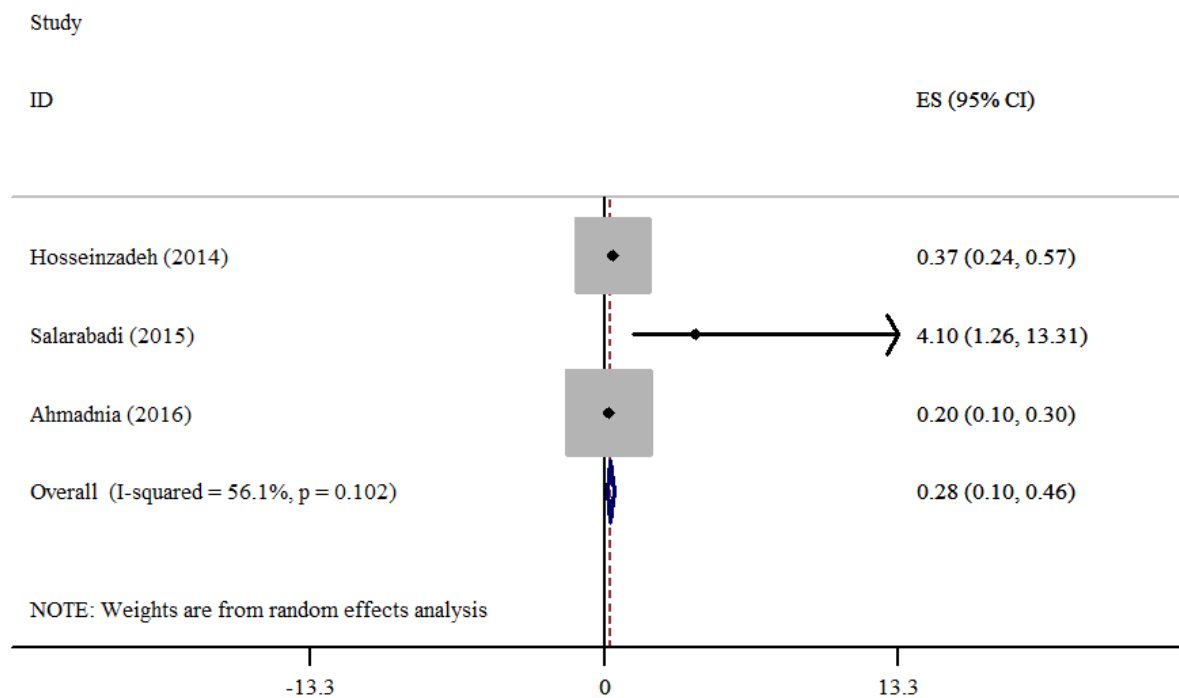

*Supplement Figure 64. Forest plot for pooling odds ratio of vegetable consumption*

Genotype status

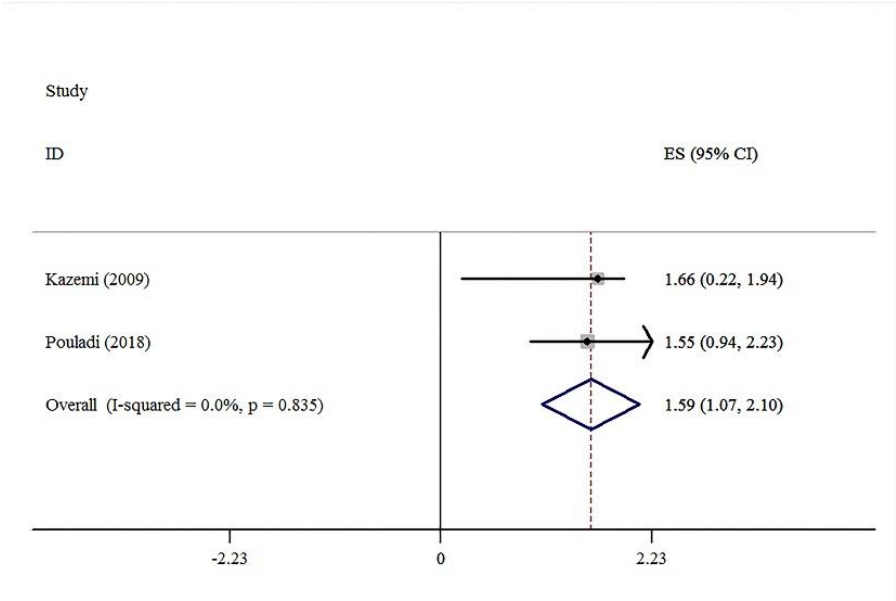

Supplement Figure 65. Forest plot for pooling odds ratio of genotype Arg/Arg

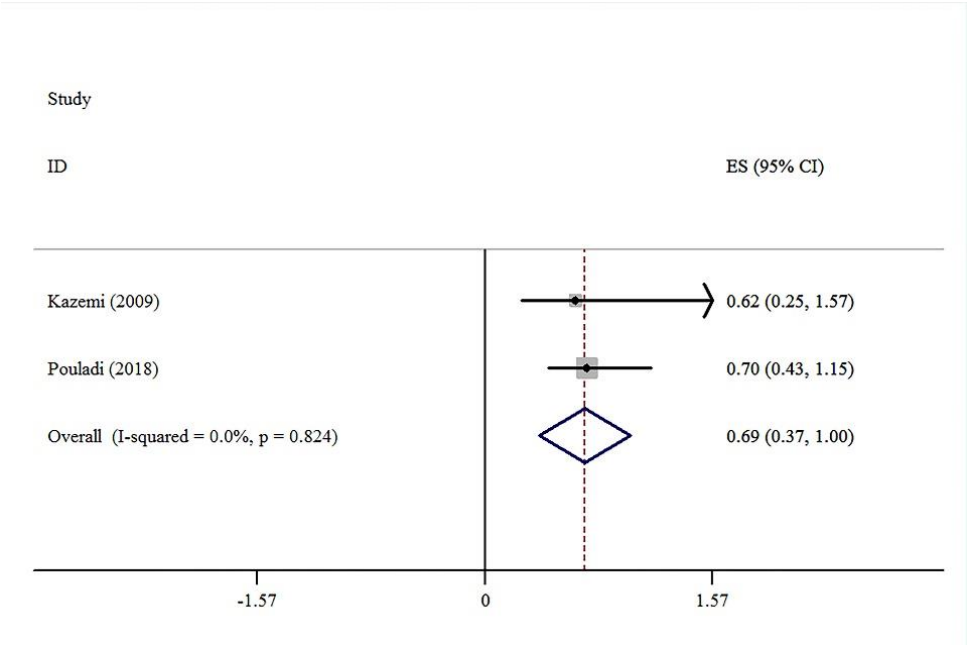

Supplement Figure 66. Forest plot for pooling odds ratio of genotype Arg/Pro

*Genital surgery*

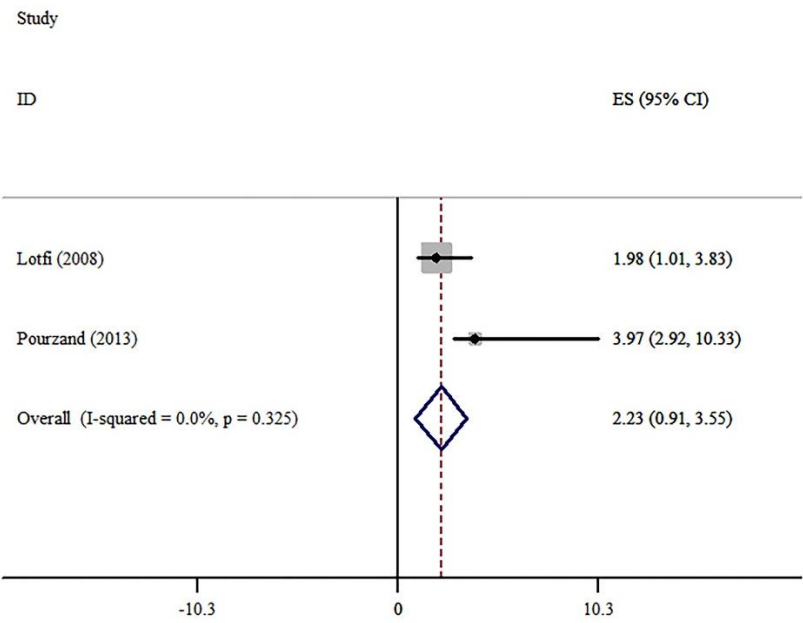

*Supplement Figure 67. Forest plot for pooling odds ratio of genital surgery status*

### Residency status

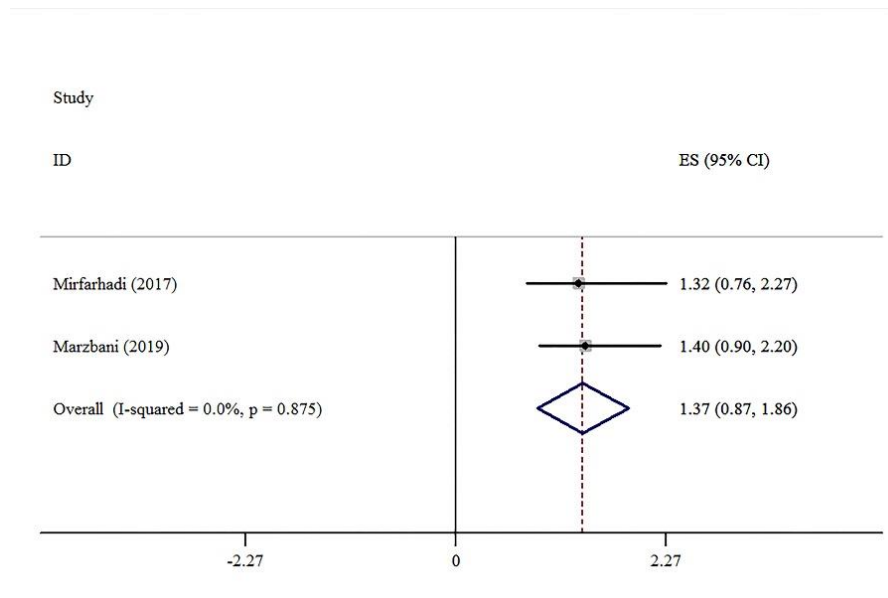

Supplement Figure 68. Forest plot for pooling odds ratio of rural residency status



|                       | Cases definition | Representativeness of the cases | Selection of Controls | Controls definition | Comparability | Ascertainment of exposure | Same method of ascertainment | Non-Response rate |
|-----------------------|------------------|---------------------------------|-----------------------|---------------------|---------------|---------------------------|------------------------------|-------------------|
| Ahmadnia 2016         | +                | +                               | +                     | +                   | -             | -                         | +                            | -                 |
| Bidgoli 2014          | +                | +                               | +                     | +                   | -             | +                         | +                            | -                 |
| Dehghan 2017          | +                | +                               | +                     | +                   | +             | +                         | +                            | -                 |
| Dianatinasab 2017     | +                | +                               | +                     | +                   | +             | +                         | -                            | -                 |
| Doosti 2011           | +                | -                               | -                     | -                   | ?             | -                         | +                            | -                 |
| Ebrahimi 2002         | +                | +                               | -                     | +                   | -             | +                         | +                            | +                 |
| Fararouei 2018        | +                | +                               | +                     | +                   | +             | +                         | +                            | -                 |
| Ghiasvand 2010        | +                | +                               | -                     | +                   | +             | +                         | +                            | -                 |
| Ghiasvand 2012        | +                | +                               | +                     | +                   | -             | +                         | +                            | +                 |
| Hajian-tilaki 2010    | +                | +                               | +                     | +                   | +             | +                         | +                            | -                 |
| Hajian-tilaki 2011    | +                | -                               | +                     | -                   | +             | +                         | +                            | -                 |
| Hosseinzadeh 2014     | +                | +                               | -                     | +                   | +             | +                         | +                            | -                 |
| Jafari-Mehdiabad 2016 | +                | +                               | +                     | +                   | -             | +                         | +                            | -                 |
| Jafarinia 2016        | +                | +                               | +                     | +                   | +             | +                         | +                            | -                 |
| Kazemi 2009           | +                | +                               | +                     | +                   | -             | +                         | +                            | -                 |
| Lotfi 2008            | +                | +                               | +                     | +                   | +             | -                         | -                            | -                 |
| Mahouri 2007          | +                | +                               | -                     | +                   | -             | +                         | +                            | -                 |
| Marzbani 2019         | +                | +                               | +                     | +                   | +             | +                         | +                            | +                 |
| Mobarakeh 2014        | +                | +                               | +                     | +                   | +             | +                         | +                            | -                 |
| Montazeri 2004        | +                | +                               | +                     | -                   | +             | +                         | +                            | -                 |
| Montazeri 2016        | +                | +                               | +                     | +                   | +             | -                         | +                            | -                 |
| Motie 2011            | +                | +                               | +                     | +                   | ?             | +                         | -                            | +                 |
| Naieni 2007           | +                | +                               | +                     | +                   | ?             | +                         | +                            | -                 |
| Pesaran 2003          | +                | +                               | +                     | +                   | -             | +                         | +                            | +                 |
| Pouladi 2018          | +                | +                               | +                     | +                   | -             | +                         | +                            | -                 |
| Salarabadi 2015       | +                | +                               | +                     | +                   | -             | +                         | +                            | -                 |
| Sepandi 2014          | +                | +                               | -                     | -                   | +             | +                         | +                            | -                 |
| Sigaroodi 2012        | +                | +                               | +                     | +                   | -             | +                         | +                            | -                 |
| Tajaddini 2015        | +                | +                               | +                     | +                   | +             | +                         | +                            | -                 |
| Tazhibi 2014          | +                | +                               | +                     | +                   | +             | +                         | +                            | -                 |
| Vahid 2017            | +                | +                               | +                     | +                   | +             | +                         | +                            | -                 |
| Vahid 2018            | +                | +                               | +                     | +                   | +             | +                         | +                            | -                 |
| Veisy 2015            | +                | +                               | +                     | +                   | -             | +                         | +                            | -                 |
| Yavari 2005           | +                | +                               | -                     | +                   | +             | +                         | -                            | +                 |
| Zare 2013             | +                | +                               | +                     | +                   | +             | +                         | +                            | +                 |

Supplement Figure 69. Summary of risk of bias for case-control studies

|                   | Representativeness of the samples | Sample size | Non-respondents | Ascertainment of the exposure | Comparability | Assessment of the outcome | Statistical test |
|-------------------|-----------------------------------|-------------|-----------------|-------------------------------|---------------|---------------------------|------------------|
| Ahmadinejad 2013  | +                                 | +           | +               | -                             | +             | +                         | +                |
| Dianatinasab 2017 | +                                 | -           | -               | +                             | +             | +                         | +                |
| Kaviani 2013      | +                                 | +           | +               | +                             | ?             | +                         | +                |
| Mirfarhadi 2017   | +                                 | +           | +               | +                             | +             | +                         | +                |

*Supplement Figure 70. Summary of risk of bias for cross-sectional studies*
